1 **Cereulide synthetase acquisition and loss events within the evolutionary history of Group**

2 **III *Bacillus cereus sensu lato* facilitate the transition between emetic and diarrheal**

3 **foodborne pathogen**

4 Laura M. Carroll<sup>a\*</sup>, Martin Wiedmann<sup>a#</sup>

5

6 <sup>a</sup>Department of Food Science, Cornell University, Ithaca, NY, USA

7 <sup>\*</sup>Current address: Structural and Computational Biology Unit, EMBL, Heidelberg, Germany

8 <sup>#</sup>Correspondence: Martin Wiedmann, [martin.wiedmann@cornell.edu](mailto:martin.wiedmann@cornell.edu)

9

10 Word Count (Abstract): 238 (Abstract) + 142 (Importance)

11 Word Count (Main Text): 4,990

## 12 **Abstract**

13 Cereulide-producing members of *Bacillus cereus sensu lato* (*B. cereus s.l.*) Group III, also  
14 known as “emetic *B. cereus*”, possess cereulide synthetase, a plasmid-encoded, non-ribosomal  
15 peptide synthetase encoded by the *ces* gene cluster. Despite the documented risks that cereulide-  
16 producing strains pose to public health, the level of genomic diversity encompassed by “emetic  
17 *B. cereus*” has never been evaluated at a whole-genome scale. Here, we employ a phylogenomic  
18 approach to characterize Group III *B. cereus s.l.* genomes which possess *ces* (*ces*-positive)  
19 alongside their closely related *ces*-negative counterparts to (i) assess the genomic diversity  
20 encompassed by “emetic *B. cereus*”, and (ii) identify potential *ces* loss and/or gain events within  
21 the evolutionary history of the high-risk and medically relevant sequence type (ST) 26 lineage  
22 often associated with emetic foodborne illness. Using all publicly available *ces*-positive Group  
23 III *B. cereus s.l.* genomes and the *ces*-negative genomes interspersed among them ( $n = 150$ ), we  
24 show that “emetic *B. cereus*” is not clonal; rather, multiple lineages within Group III harbor  
25 cereulide-producing strains, all of which share a common ancestor incapable of producing  
26 cereulide (posterior probability [PP] 0.86-0.89). The ST 26 common ancestor was predicted to  
27 have emerged as *ces*-negative (PP 0.60-0.93) circa 1904 (95% highest posterior density [HPD]  
28 interval 1837.1-1957.8) and first acquired the ability to produce cereulide before 1931 (95%  
29 HPD 1893.2-1959.0). Three subsequent *ces* loss events within ST 26 were observed, including  
30 among isolates responsible for *B. cereus s.l.* toxicoinfection (i.e., “diarrheal” illness).

## 31 **Importance**

32 “*B. cereus*” is responsible for thousands of cases of foodborne disease each year worldwide,  
33 causing two distinct forms of illness: (i) intoxication via cereulide (i.e., “emetic” syndrome) or  
34 (ii) toxicoinfection via multiple enterotoxins (i.e., “diarrheal” syndrome). Here, we show that

35 “emetic *B. cereus*” is not a clonal, homogenous unit that resulted from a single cereulide  
36 synthetase gain event followed by subsequent proliferation; rather, cereulide synthetase  
37 acquisition and loss is a dynamic, ongoing process that occurs across lineages, allowing some  
38 Group III *B. cereus s.l.* populations to oscillate between diarrheal and emetic foodborne pathogen  
39 over the course of their evolutionary histories. We also highlight the care that must be taken  
40 when selecting a reference genome for whole-genome sequencing-based investigation of emetic  
41 *B. cereus s.l.* outbreaks, as some reference genome selections can lead to a confounding loss of  
42 resolution and potentially hinder epidemiological investigations.

## 43 Introduction

44 The *Bacillus cereus* group (also known as *B. cereus sensu lato* [*s.l.*]) is a complex of  
45 closely related, Gram-positive, spore-forming members of the genus *Bacillus*, which vary in their  
46 ability to cause illness in humans (1). Members of *B. cereus s.l.* were estimated to be responsible  
47 for more than 256,000 foodborne intoxications worldwide in 2010 (2), although this is likely an  
48 underestimate due to the mild symptoms frequently associated with this illness (1). Foodborne  
49 “*B. cereus*” intoxication (i.e., “emetic” illness) is caused by cereulide, a highly heat- and pH-  
50 stable toxin, which is pre-formed in a food matrix prior to consumption. These intoxications have  
51 a relatively short incubation period (typically 0.5 – 6 h) and are often accompanied by symptoms  
52 of vomiting and nausea (1, 3-5). This can be contrasted with “*B. cereus*” toxicoinfection (i.e.,  
53 “diarrheal” illness), a different form of illness in which multiple enterotoxins produced within  
54 the host small intestine yield diarrheal symptoms which typically onset after 8 – 16 h (1, 6).  
55 Notably, emetic and diarrheal symptoms are not always congruent with “*B. cereus*” emetic and  
56 diarrheal syndromes, respectively, as both vomiting and diarrheal symptoms may be reported  
57 among cases (7, 8).

58 Production of cereulide, the toxin responsible for emetic “*B. cereus*” foodborne illness,  
59 can be attributed to cereulide synthetase, a non-ribosomal peptide synthetase encoded by the  
60 cereulide synthetase biosynthetic gene cluster (*ces*) (9, 10). *ces* has been detected in two major *B.*  
61 *cereus s.l.* phylogenetic groups (assigned using the sequence of pantoate-beta-alanine ligase  
62 [*panC*] and a seven-group typing scheme): Group III and Group VI of *B. cereus s.l.* (10-16).  
63 While cereulide-producing Group VI strains, also known as “emetic *B. weihenstephanensis*”,  
64 have been isolated on rare occasions (14, 15, 17-19), the bulk of cereulide-producing strains  
65 belong to Group III (8, 10, 13, 16). Often referred to as “emetic *B. cereus*”, cereulide-producing

66 Group III strains often harbor *ces* on plasmids (9, 10, 19), and have been linked to outbreaks  
67 around the world (5, 7, 8, 20). It is essential to note that Group III *B. cereus s.l.* isolates do not  
68 belong to the *B. cereus sensu stricto* (*s.s.*) species (i.e., *B. cereus s.l.* Group IV) (7, 21). A  
69 recently proposed taxonomic reorganization of *B. cereus s.l.* (21) refers to Group III *B. cereus*  
70 *s.l.* as *B. mosaicus*; however, the use of “Group III *B. cereus s.l.*” throughout the remainder of  
71 this study is intentional, as, at the present time, it is likely more interpretable to microbiologists  
72 than the recently proposed nomenclature.

73 Despite the documented risks that cereulide-producing strains pose to public health, the  
74 level of genomic diversity encompassed by “emetic *B. cereus*” has not been evaluated at a  
75 whole-genome scale. Furthermore, potential heterogeneity in cereulide production capabilities  
76 among lineages encompassed by “emetic *B. cereus*” has never been assessed; plasmid-encoded  
77 *ces* and, thus, the ability to produce cereulide, can hypothetically be gained or lost within a  
78 lineage, although the extent to which this happens is unknown. Here, we employ phylogenomic  
79 approaches to characterize Group III *B. cereus s.l.* genomes that possess *ces* (*ces*-positive)  
80 alongside their closely related *ces*-negative counterparts to (i) assess the genomic diversity  
81 encompassed by cereulide-producing Group III strains (i.e., “emetic *B. cereus*”), and (ii) identify  
82 potential *ces* loss and/or gain events within the “emetic *B. cereus*” evolutionary history.

## 83 **Results**

84 **Cereulide-producing members of Group III *B. cereus s.l.* are distributed across multiple**  
85 **lineages and share a common ancestor incapable of synthesizing cereulide.** Of the 2,261 *B.*  
86 *cereus s.l.* genomes queried here (see Supplemental Table S1), 60 genomes belonged to *panC*  
87 Group III and possessed cereulide synthetase-encoding *cesABCD* (referred to hereafter as “*ces*-  
88 positive” genomes). Overall, 31 STs assigned using *in silico* multi-locus sequence typing

89 (MLST) were observed among the 150 Group III isolates included in this study, with *ces*-  
90 positive isolates represented by five STs (ST 26, 144, 164, 869, and 2056; Figure 1 and  
91 Supplemental Table S1). Four of these STs (ST 26, 144, 164, and 869) also encompassed one or  
92 more isolates that lacked cereulide synthetase (referred to hereafter as “*ces*-negative isolates”;  
93 Figure 1 and Supplemental Table S1).

94 The 150 Group III genomes queried here (which included all 30 publicly available *ces*-  
95 positive genomes, as well as 30 *ces*-positive genomes from a 2016 emetic foodborne outbreak)  
96 were distributed into three major clusters and nine sub-clusters using RhierBAPs, with *ces*-  
97 positive isolates present in two and five clusters and sub-clusters, respectively (Figure 1). When  
98 PopCOGenT was used to delineate populations using recent gene flow, genomes were  
99 distributed among two sub-clusters (i.e., populations), with *ces*-positive genomes present in both  
100 sub-clusters. All genomes were assigned to a single “main cluster”, a unit that has been proposed  
101 to mirror the “species” definition applied to plants and animals (Figure 1) (22). Congruent with  
102 these findings, pairwise average nucleotide identity (ANI) values calculated between the 150  
103 genomes confirmed that all cereulide-producing Group III strains would be considered to be  
104 members of the same genomospecies using any previously proposed genomospecies threshold  
105 for *B. cereus s.l.* (i.e., 92.5-96 ANI) (21, 23-26). However, considerable genomic diversity  
106 existed among cereulide-producing isolates, as *ces*-positive genomes could share as low as 97.5  
107 ANI with others (Figure 2).

108 The common ancestor of all *ces*-positive Group III genomes was predicted to not possess  
109 *cesABCD* and, thus, not be capable of cereulide production, regardless of outgroup or use of core  
110 or majority SNPs (*ces*-negative state posterior probability [PP] 0.86-0.89; Figure 1,  
111 Supplemental Figures S1 and S2, and Supplemental Table S2). For STs 144, 164, 869, and 2056,

112 a single *ces*-positive isolate was present among genomes assigned to the ST (Figure 1).  
113 Consequently, a single acquisition event was predicted to be responsible for the presence of *ces*-  
114 positive lineages within each of these STs, and the common ancestor shared by each ST  
115 encompassing more than one genome was predicted to lack *ces* (Figure 1, Supplemental Figures  
116 S1 and S2, and Supplemental Table S2).

117 **ST 26 first acquired the ability to cause emetic foodborne illness in the twentieth century.**  
118 ST 26 was the only ST that encompassed multiple *ces*-negative and *ces*-positive strains (Figure  
119 1); therefore, the dynamics of cereulide synthetase loss and gain could be analyzed among  
120 members of this lineage. ST 26 isolates in this study were predicted to have evolved from a  
121 common ancestor that existed circa 1904 (estimated node age of 1904.3, with a 95% highest  
122 posterior density [HPD] interval of 1837.1-1957.8 for common ancestor node heights; Figure 3)  
123 with an estimated evolutionary rate of  $3.04 \times 10^{-7}$  substitutions/site/year (95% HPD  $1.47 \times 10^{-7}$  -  
124  $4.74 \times 10^{-7}$  substitutions/site/year). Ancestral state reconstruction within ST 26 indicated that the  
125 ST 26 common ancestor did not possess cereulide synthetase (*ces*-negative state PP 0.60-0.93;  
126 Figure 4, Supplemental Figure S3, and Supplemental Table S2). Rather, *cesABCD* were  
127 predicted to have been first acquired within ST 26 between  $\approx 1904$  and  $\approx 1931$  (95% HPD 1837.1-  
128 1957.8 and 1893.2-1959.0 for common ancestor node heights, respectively; Figures 3 and 4 and  
129 Supplemental Figure S3). Subsequent losses of *cesABCD* among ST 26 were predicted to have  
130 occurred on three occasions: (i) one after 1946 (common ancestor node height 95% HPD 1914.5-  
131 1971.0); (ii) one after 1962.9 (common ancestor node height 95% HPD 1938.1-1985.0); and (iii)  
132 one between 1961.6 and 1966.7 (95% HPD 1934.7-1983.0 and 1941.6-1987.7, respectively;  
133 Figures 3 and 4 and Supplemental Figure S3) (16).

134 **Choice of emetic Group III *B. cereus* s.l. reference genome for reference-based SNP calling**  
135 **affects ST 26 phylogenomic topology.** SNP identification using reference-based approaches and  
136 subsequent phylogeny construction are critical methods used in foodborne pathogen surveillance  
137 and outbreak investigation efforts. To determine if choice of emetic reference genome could  
138 affect the topology of the ST 26 phylogeny, SNPs were identified among all 64 ST 26 genomes  
139 using four reference-based SNP calling pipelines and six emetic reference genomes, which  
140 encompassed all observed Group III emetic STs (Table 1). Notably, the emetic Group III genome  
141 that was most distantly related to ST 26 (ST 869) did not yield sufficient resolution to produce a  
142 phylogeny when it was used as a reference for BactSNP/Gubbins and Snippy/Gubbins (Tables 1  
143 and 2). For the BactSNP pipeline, the emetic ST 2056 genome additionally did not yield an  
144 alignment of SNPs among ST 26 isolates when it was used as a reference (Tables 1 and 2).

145 For the remaining SNP calling pipeline/reference genome combinations, the resulting  
146 phylogeny was compared to the phylogeny produced using the respective pipeline and the  
147 chromosome of ST 26 str. AH187 as a reference. In addition to being a well-characterized emetic  
148 strain for which a closed genome is available, str. AH187 was closely related to the 64 ST 26  
149 isolates queried here and has previously been shown to serve as an adequate reference genome  
150 for SNP calling within ST 26 (7). For all SNP calling pipelines, phylogenies produced using the  
151 genomes of emetic ST 26 str. IS195 and emetic ST 164 str. AND1407 as references were more  
152 topologically similar to those produced using str. AH187 than would be expected by chance  
153 (Kendall-Colijn  $P < 0.05$  after a Bonferroni correction; Table 1). However, the topology of  
154 phylogenies produced using Parsnp and Snippy with emetic ST 144 str. MB.17 differed from that  
155 produced using str. AH187 (Kendall-Colijn  $P > 0.05$  after a Bonferroni correction; Table 1).  
156 Lyve-SET was the only pipeline that produced phylogenies that were more topologically similar



157 to that produced using str. AH187 than would be expected by chance, regardless of emetic  
158 reference (Kendall-Colijn  $P < 0.05$  after a Bonferroni correction; Table 1).

159 Despite producing phylogenies that resembled the AH187 phylogeny for five of six  
160 emetic reference genomes (Kendall-Colijn  $P < 0.05$  after a Bonferroni correction; Table 1), core  
161 SNP alignments produced with Parsnp yielded relatively large pairwise SNP distances between  
162 emetic ST 26 genomes from a known outbreak (7). Regardless of reference genome selection,  
163 the difference between the minimum number of SNPs shared between outbreak and non-  
164 outbreak isolates and the maximum number of SNPs detected between two outbreak isolates was  
165 less than the maximum number of SNPs shared between two outbreak isolates (Table 2). A  
166 similar phenomenon was observed when Snippy was used with a distant emetic ST 2056 strain  
167 as a reference (Table 2).

## 168 **Discussion**

### 169 **Group III *B. cereus s.l.* isolates capable of causing emetic foodborne illness are not clonal.**

170 Cereulide-producing *B. cereus s.l.* strains are responsible or suspected to be responsible for  
171 thousands of cases of foodborne illness each year worldwide (2), including rare but severe forms  
172 of illness which may result in death (27-31). While efforts to characterize this important  
173 pathogen using whole-genome sequencing have begun only recently, the amount of publicly  
174 available genomic data derived from “emetic *B. cereus*” has been increasing (21). Consequently,  
175 the current dogma regarding the evolutionary history of this group of organisms must be  
176 revisited; while prior studies assert that cereulide-producing Group III members represent a  
177 highly clonal complex within *B. cereus s.l.* (10, 16), other efforts have hinted that “emetic *B.*  
178 *cereus*” showcases a considerable degree of genomic diversity (21, 32-34).

179           Using all publicly available emetic Group III *B. cereus s.l.* genomes and the non-emetic  
180 genomes interspersed among them, we show on a whole-genome scale that “emetic *B. cereus*” is  
181 not clonal. Emetic toxin production capabilities within Group III are not the result of a single  
182 cereulide synthetase gain event followed by subsequent proliferation; rather, the common  
183 ancestor of all cereulide-producing Group III isolates was likely incapable of producing  
184 cereulide, and emetic toxin production capabilities resulted from at least five independent  
185 cereulide synthetase acquisition events (at least one in each of STs 26, 144, 164, 869, and 2056;  
186 Figures 1 and 4). Pairwise ANI values calculated between emetic Group III strains were as low  
187 as 97.5 ANI; for comparison, all members of the highly similar *B. anthracis* lineage commonly  
188 attributed to anthrax illness share  $\geq 99.9$  ANI with one another (21, 35), while genomes  
189 belonging to *Salmonella enterica* subspecies *enterica* (which is not considered to be clonal) can  
190 share pairwise ANI values as low as 97.0 (calculated between 425 genomes described by  
191 Worley, et al., using FastANI v. 1.0 as described in the Methods section) (36).

192           These findings are important, as unexpected diversity can confound bioinformatic  
193 analyses used to identify outbreaks from genomic data. For example, an evolutionarily distant  
194 reference genome can affect which SNPs are identified during reference-based SNP calling  
195 among bacterial genomes (7, 37-40). This can, in turn, affect metrics used to determine whether  
196 an isolate should be included or excluded from an outbreak (e.g., the topology of a resulting  
197 phylogeny, pairwise SNP cut-offs) (7, 38-40). Here, we showed that emetic Group III isolates are  
198 considerably diverse, so much so that the use of some “emetic *B. cereus*” genomes as references  
199 for SNP calling can lead to a topologically confounding loss of resolution. The use of  
200 BactSNP/Gubbins and Snippy/Gubbins with distant emetic ST 869 as a reference, for example,  
201 yielded SNPs that could not reliably differentiate ST 26 genomes from each other. In an outbreak

202 scenario, these approaches would incorrectly place non-outbreak isolates among outbreak ones,  
203 potentially confounding an investigation. It is thus essential that the diversity of “emetic *B.*  
204 *cereus*” is acknowledged and accounted for to ensure that epidemiological investigations are not  
205 hindered.

206 **One pathogen, two illnesses: ST 26 *B. cereus s.l.* has oscillated between “emetic” and**  
207 **“diarrheal” foodborne pathogen throughout the twentieth century.** “*B. cereus*” was first  
208 established as the causative agent of a diarrheal form of foodborne illness in the 1950s (20, 41).  
209 Notably, prior to the 1970s, illnesses attributed to “*B. cereus*” were of the diarrheal type (i.e.,  
210 toxicoinfection characterized by symptoms of watery diarrhea that onset 8-16 h after ingestion)  
211 (20). However, in the 1970s, a novel type of “*B. cereus*” illness, emetic intoxication, began to be  
212 reported (20). Characterized by symptoms of vomiting and nausea and a relatively short  
213 incubation time (i.e., 0.5-6 h), “*B. cereus*” emetic illness was first described in the United  
214 Kingdom in 1971, and was linked to the consumption of rice served at restaurants and take-away  
215 outlets (20). It has been hypothesized that emetic toxin production may confer a selective  
216 advantage (16), and the results reported here support the hypothesis that cereulide synthetase was  
217 acquired by some Group III lineages relatively recently in their evolutionary histories (16). Here,  
218 we show that ST 26, which has frequently been associated with emetic foodborne illness (7, 32,  
219 42, 43), first acquired cereulide synthetase and, thus, the ability to cause emetic illness in the  
220 twentieth century, likely between 1904 and 1931 (95% HPD interval of 1837.1-1959.0). This  
221 indicates that cereulide-producing *B. cereus s.l.* may have been responsible for cryptic cases of  
222 emetic intoxication prior to the 1970s; however, it is unsurprising that these cases would go  
223 undetected or unattributed to *B. cereus s.l.*, due to the mild and transient symptoms typically  
224 associated with this illness (1, 44).

225           The temporal characterization of cereulide synthetase acquisition and loss provided here  
226 additionally showcases that ST 26 has transitioned between an emetic and non-emetic pathogen  
227 over the course of its evolutionary history. This is important, as *ces*-negative members of ST 26  
228 still present a relevant public health and food safety risk, as they may still be capable of causing  
229 diarrheal illness. For example, the lineage to which ST 26 str. NVH 0075-95 belongs lost *ces*  
230 between  $\approx$ 1962 and 1967. While previously shown to be incapable of producing cereulide, this  
231 strain produces diarrheal non-hemolytic enterotoxin (Nhe), is highly cytotoxic, and was isolated  
232 from vegetable stew associated with a diarrheal outbreak in Norway (16, 45, 46). Additionally,  
233 cereulide-producing strains can be high producers of diarrheal enterotoxins (8). It has been  
234 hypothesized that the simultaneous ingestion of food contaminated with cereulide alongside the  
235 cereulide- and enterotoxin-producing strains themselves may be responsible for a mixture of  
236 diarrheal and emetic symptoms among some cases of *B. cereus s.l.* foodborne illness (8), and this  
237 may partially explain why these illnesses may not always present within a strictly “emetic-vs-  
238 diarrheal” dichotomy (7, 8).

239 **Heterogeneous emetic phenotype presentation among diverse Group III *B. cereus s.l.***  
240 **isolates can yield taxonomic inconsistencies: the “emetic *B. cereus*” problem.** Recent  
241 inconsistencies have arisen in the *B. cereus s.l.* taxonomic space: *B. paranthracis*, a novel  
242 species proposed in 2017 (26), was found to encompass all cereulide-producing Group III *B.*  
243 *cereus s.l.* strains at conventional species thresholds (21). Using multiple metrics for species  
244 delineation (i.e., ANI-based genomospecies assignment, methods querying recent gene flow), we  
245 confirm that all cereulide-producing Group III isolates, along with *B. paranthracis* and the other  
246 *ces*-negative isolates queried here (excluding outgroup genomes), belong to a single  
247 genomospecies. However, using “*B. paranthracis*” to describe cereulide-producing Group III

248 members is problematic, as *B. paranthracis* was only recently proposed as a novel species, is not  
249 well-recognized outside the small *B. cereus s.l.* taxonomic space, and hence would not typically  
250 be equated with a foodborne pathogen (21).

251 Referring to cereulide-producing Group III lineages as “emetic *B. cereus*”, however, is  
252 also problematic. Because cereulide synthetase is often plasmid-encoded (1, 9, 10, 47), it may be  
253 possible for emetic toxin production capabilities to be lost, gained, present across multiple  
254 lineages, and absent within individual lineages (21). Here we show that this is not just a  
255 hypothetical scenario: even with the limited number of genomes presently available, we  
256 observed five cereulide synthetase gain events across Group III, and three loss events within ST  
257 26 alone, indicating that cereulide synthetase loss and gain is a dynamic and ongoing process.  
258 Additionally, a taxonomic label of “*B. cereus*” as it is applied to Group III *B. cereus s.l.* is  
259 misleading, as Group III strains are not actually members of the *B. cereus sensu stricto (s.s.)*  
260 species, regardless of which previously proposed genomospecies threshold for *B. cereus s.l.* is  
261 used to define species (i.e., 92.5-96 ANI) (7, 21, 23-26).

262 Taxonomic labels used to refer to *ces*-negative isolates interspersed among cereulide-  
263 producing Group III isolates (i.e., the *ces*-negative isolates queried here) are even more  
264 ambiguous. Some of these *ces*-negative isolates are capable of causing diarrheal illness (16, 45,  
265 46) and are thus relevant threats to global public health; however, prior to 2020, there was no  
266 standardized nomenclature with which these isolates could be described. For example, the  
267 following names have been used to refer to *ces*-negative, Group III strains: (i) “emetic-like *B.*  
268 *cereus*”, (ii) “*B. cereus*”, (iii) “Group III *B. cereus*”, (iv) “*B. paranthracis*”, or (v) “*B. cereus*  
269 *sensu stricto*”/“*B. cereus s.s.*”, although it should be noted that *B. cereus s.s.* is a misnomer; as  
270 mentioned previously, Group III strains do not fall within the genomospecies boundary of the *B.*

271 *cereus s.s.* type strain and thus are not actually members of the *B. cereus s.s.* species (12, 16, 26,  
272 48-51).

273 It is thus essential that microbiologists, clinicians, public health officials, and industrial  
274 professionals find common ground and adhere to a standardized nomenclature when describing  
275 Group III *B. cereus s.l.* Recently, we have proposed a taxonomic framework which can account  
276 for emetic heterogeneity among *B. cereus s.l.* genomes through the incorporation of a  
277 standardized collection of biovar terms (21), including the biovar term “Emeticus”. Using this  
278 framework, all cereulide-producing members of *B. cereus s.l.* (including “emetic *B.*  
279 *weihenstephanensis*”) can be referenced using the name *B. Emeticus*. All cereulide-producing  
280 Group III lineages are *B. mosaicus* subspecies *cereus* biovar Emeticus (full name) or *B. cereus*  
281 biovar Emeticus (shorted subspecies notation), while the *ces*-negative isolates interspersed  
282 among them are *B. mosaicus* subsp. *cereus* (full name) or *B. cereus* (shortened subspecies  
283 notation) (21). Note that “*sensu stricto*” or “*s.s.*” is not appended to these names; as mentioned  
284 above, Group III *B. cereus s.l.* lineages do not belong to the same species as Group IV *B. cereus*  
285 *s.s.* type strain ATCC 14579 (7, 21).

286 This study is the first to offer insight into the temporal dynamics of cereulide synthetase  
287 loss and gain among Group III *B. cereus s.l.*, and it showcases the importance of accounting for  
288 emetic heterogeneity among Group III lineages. As genomic sequencing grows in popularity and  
289 more Group III genomes are sequenced, the estimates provided here can be further refined and  
290 improved. Furthermore, it is likely that additional cereulide synthetase loss and gain events will  
291 be observed, and that previously uncharacterized emetic Group III lineages will be discovered.

## 292 **Methods**

293 **Acquisition of Group III *B. cereus s.l.* genomes and metadata.** All genomes submitted to

294 NCBI RefSeq (52) as a published *B. cereus s.l.* species (21, 23-26, 53) were downloaded ( $n =$   
295 2,231; accessed November 19, 2018). The ANI function in BTyper v. 2.3.3 (13) was used to  
296 calculate ANI values between each genome and the type strain/species reference genomes of  
297 each of the 18 published *B. cereus s.l.* species as they existed in 2019 (7). Genomes that (i) most  
298 closely resembled *B. paranthracis* and (ii) shared an ANI value  $\geq 95$  with *B. paranthracis* were  
299 used in subsequent steps ( $n = 120$ ), as this set of genomes contained all Group III genomes that  
300 possessed genes encoding cereulide synthetase (described in detail below). These genomes were  
301 supplemented with 30 genomes of strains isolated in conjunction with a 2016 emetic outbreak  
302 (7), resulting in 150 Group III *B. cereus s.l.* genomes (Supplemental Table S1). FastANI v. 1.0  
303 (35) was used to confirm that all 150 genomes (i) shared  $\geq 95$  ANI with the *B. paranthracis* type  
304 strain genome, and (ii) most closely resembled the *B. paranthracis* type strain genome when  
305 compared to the 18 *B. cereus s.l.* type strain/reference genomes.

306 Metadata for each of the 150 genomes were obtained using publicly available records,  
307 and BTyper was used to assign each genome to a ST using the seven-gene MLST scheme  
308 available in PubMLST (Supplemental Text) (54). To assess the emetic potential of each genome,  
309 BTyper was used to detect cereulide synthetase genes *cesABCD* in each genome, first using the  
310 default coverage and identity thresholds (70 and 50%, respectively), and a second time with 0%  
311 coverage to confirm that *cesABCD* were absent from genomes in which they were not detected  
312 (the only genome affected by this was one of the outbreak isolates, FSL R9-6384, which had  
313 *cesD* split on two contigs). Isolates in which *cesABCD* were not detected were given a  
314 designation of *ces*-negative. BTyper was additionally used to detect *cesABCD* in each of the  
315 2,111 *B. cereus s.l.* genomes not included in this study, as well as to assign all genomes to a  
316 *panC* group using the typing scheme described by Guinebretiere, et al (12). All 150 genomes

317 selected for this study were assigned to *panC* Group III, and all Group III genomes possessing  
318 *cesABCD* were confirmed to have been included in this study. The only other genomes that  
319 possessed *cesABCD* belonged to *panC* Group VI and most closely resembled *B. mycoides/B.*  
320 *weihenstephanensis* (i.e., “emetic *B. weihenstephanensis*”) (21).

321 **Construction of Group III *B. cereus s.l.* maximum likelihood phylogenies and ancestral**  
322 **state reconstruction.** kSNP3 v. 3.1 (55, 56) was used to identify (i) core and (ii) majority SNPs  
323 among the 150 genomes described above, plus one of two outgroup genomes (to ensure that  
324 choice of outgroup did not affect ancestral state reconstruction; Supplemental Text), using the  
325 optimal *k*-mer size determined by Kchooser ( $k = 21$  for both). For each of the four SNP  
326 alignments (i.e., each combination of outgroup and either core or majority SNPs), IQ-TREE v.  
327 1.6.10 (57-60) was used to construct a maximum likelihood (ML) phylogeny (Supplemental  
328 Text).

329 To ensure that ancestral state reconstruction would not be affected by genomes over-  
330 represented in RefSeq (e.g., genomes confirmed or predicted to have been derived from strains  
331 isolated from the same outbreak), potential duplicate genomes were removed using isolate  
332 metadata and by assessing clustering in the phylogenies described above. One representative  
333 genome was selected from clusters that likely consisted of duplicate genomes and/or isolates  
334 derived from the same source. For example, this procedure reduced 30 closely related isolates  
335 from an outbreak (7) to one isolate. Overall, this approach yielded a reduced, de-replicated set of  
336 71 genomes (Supplemental Table S1). kSNP3 and IQ-TREE were again used to identify core and  
337 majority SNPs and construct ML phylogenies among the set of 71 de-replicated genomes, plus  
338 each of the two outgroup genomes, as described above, but with *k* adjusted to the optimal *k*-mer  
339 size produced by Kchooser ( $k = 23$  for both).



340 To estimate ancestral character states of internal nodes in the Group III phylogeny as they  
341 related to cereulide production (i.e., whether a node represented an ancestor that was *ces*-positive  
342 or *ces*-negative), the presence or absence of *ces* within each genome was treated as a binary state.  
343 Each of the four phylogenies constructed using the de-replicated set of 71 genomes as described  
344 above was rooted at its respective outgroup, and stochastic character maps were simulated on  
345 each phylogeny using the `make.simmap` function in the `phytools` package (61), the all-rates-  
346 different (ARD) model, and one of two root node priors (eight total combinations of two root  
347 node priors and four phylogenies; Supplemental Text and Supplemental Table S2).

348 **Assessment of Group III *B. cereus s.l.* population structure.** Core SNPs detected among the  
349 71 de-replicated Group III genomes using `kSNP3` (see section “Construction of Group III *B.*  
350 *cereus s.l.* maximum likelihood phylogenies and ancestral state reconstruction” above) were used  
351 as input for `RhierBAPS` (62) to identify clusters, using two levels. The same set of 71 genomes  
352 was used as input for `PopCOGenT` (downloaded October 5, 2019) to identify gene flow units and  
353 populations (Supplemental Text) (22).

354 **Construction of Group III *B. cereus s.l.* ST 26 temporal phylogeny.** `Snippy v. 4.3.6` (63) was  
355 used to identify core SNPs among the de-replicated set of 23 ST 26 genomes (see section  
356 “Construction of Group III *B. cereus s.l.* maximum likelihood phylogenies and ancestral state  
357 reconstruction” above), using the closed chromosome of emetic ST 26 str. AH187 (NCBI  
358 RefSeq Assession NC\_011658.1) as a reference genome (Supplemental Text). `Gubbins v. 2.3.4`  
359 (64) was used to remove recombination from the resulting alignment, and `snp-sites` (65) was  
360 used to obtain core SNPs among the 23 genomes. `IQ-TREE` was used to construct a phylogeny  
361 (Supplemental Text), and the temporal signal of the resulting ML phylogeny was assessed using  
362 `TempEst v. 1.5.3` ( $R^2 = 0.26$  using the best-fitting root) (66).

363 Using the ST 26 core SNP alignment as input, BEAST v. 2.5.1 (67, 68) was used to  
364 construct a tip-dated phylogeny (Supplemental Text). The Standard\_TVMef nucleotide  
365 substitution model implemented in the SSM package (69) was used with 5 Gamma categories,  
366 and an ascertainment bias correction was applied to account for the use of solely variant sites  
367 (Supplemental Text) (70). A relaxed lognormal molecular clock (71) was used with an initial  
368 clock rate of  $1.0 \times 10^{-9}$  substitutions/site/year, and a broad lognormal prior was placed on the  
369 uclldMean parameter (in real space,  $M = 1.0 \times 10^{-3}$  and  $S = 4.0$ ) (Supplemental Text). A serial  
370 Birth-Death Skyline population model (72) was used to account for potential sampling biases  
371 stemming from the overrepresentation of strains isolated in recent years (Supplemental Text).

372 Five independent runs using the model described above were performed, using chain  
373 lengths of at least 100 million generations, sampling every 10,000 generations. For each  
374 independent replicate, Tracer v. 1.7.1 (73) was used to ensure that each parameter had mixed  
375 adequately with 10% burn-in, and LogCombiner-2 was used to combine log and tree files from  
376 each independent run (Supplemental Text). TreeAnnotator-2 (74) was used to produce a  
377 maximum clade credibility tree from the combined tree files, using Common Ancestor node  
378 heights (Supplemental Text).

379 **Cereulide synthetase ancestral state reconstruction for ST 26 genomes.** Ancestral state  
380 reconstruction as it related to cereulide production was performed using the temporal ST 26  
381 phylogeny as input (see section “Construction of Group III *B. cereus s.l.* ST 26 temporal  
382 phylogeny” above). Stochastic character maps were simulated on the phylogeny using the  
383 make.simmap function, the ARD model, and one of three priors on the root node (Supplemental  
384 Text).

385 **Evaluation of the influence of reference genome selection on ST 26 phylogenomic topology.**

386 To determine if choice of reference genome affected ST 26 phylogenomic topology, SNPs were  
387 identified among all 64 ST 26 genomes using four different reference-based SNP calling  
388 pipelines, chosen for their ability to utilize assembled genomes or both assembled genomes and  
389 Illumina reads as input: (i) BactSNP v. 1.1.0 (75), (ii) Lyve-SET v. 1.1.4g (76), (iii) Parsnp v. 1.2  
390 (77), and (iv) Snippy v. 4.3.6. For alignments produced using BactSNP and Snippy, Gubbins v.  
391 2.3.4 (64) was used to filter out recombination events; for Parsnp, PhiPack (78) was used to  
392 remove recombination (Supplemental Text).

393 Each of four SNP calling pipelines was run six separate times, each time using one of six  
394 emetic Group III reference genomes (Table 1 and Supplemental Text). The tested reference  
395 genomes represented all available Group III STs in which *cesABCD* were detected. For each  
396 SNP calling pipeline, the phylogeny constructed using SNPs identified with emetic ST 26 str.  
397 AH187 as a reference genome was treated as a reference tree, as this genome was closely related  
398 to all ST 26 isolates in the study and has previously been shown to serve as an adequate  
399 reference genome for ST 26 (7). For each of the four SNP calling pipelines, the Kendall-Colijn  
400 (79, 80) test described by Katz et al. (76) was used to compare the topology of each tree to the  
401 pipeline's respective AH187 reference phylogeny, using midpoint-rooted trees, a lambda value  
402 of 0 (to give weight to tree topology, rather than branch lengths), and a background distribution  
403 of 100,000 random trees (Supplemental Text) (76). Pairs of trees were considered to be more  
404 topologically similar than would be expected by chance (76) if a significant *P*-value resulted  
405 after a Bonferroni correction was applied ( $P < 0.05$ ).

406 **Data availability.** Accession numbers for all isolates included in this study are available in  
407 Supplemental Table S1. The raw BEAST 2 XML file, the code used to perform ancestral state

408 reconstruction, and all phylogenies are available at:

409 [https://github.com/lmc297/Group\\_III\\_bacillus\\_cereus](https://github.com/lmc297/Group_III_bacillus_cereus).

#### 410 **Acknowledgments**

411 This material is based on work supported by the National Science Foundation Graduate Research  
412 Fellowship Program under grant no. DGE-1650441. The work was also partially supported by  
413 USDA NIFA grant 2019-67017-29591. The authors would like to acknowledge those who have  
414 generously collected and provided the publicly available genomic data and/or metadata used in  
415 this study (14, 18, 26, 45, 81-118).

416

417

418

419

420

421

422

423

424

425

426

427

428

429

430

431 **References**

- 432 1. Stenfors Arnesen LP, Fagerlund A, Granum PE. 2008. From soil to gut: *Bacillus cereus*  
433 and its food poisoning toxins. FEMS Microbiol Rev 32:579-606.
- 434 2. Kirk MD, Pires SM, Black RE, Caipo M, Crump JA, Devleeschauwer B, Dopfer D,  
435 Fazil A, Fischer-Walker CL, Hald T, Hall AJ, Keddy KH, Lake RJ, Lanata CF,  
436 Torgerson PR, Havelaar AH, Angulo FJ. 2015. World Health Organization Estimates of  
437 the Global and Regional Disease Burden of 22 Foodborne Bacterial, Protozoal, and Viral  
438 Diseases, 2010: A Data Synthesis. PLoS Med 12:e1001921.
- 439 3. Ehling-Schulz M, Fricker M, Scherer S. 2004. *Bacillus cereus*, the causative agent of an  
440 emetic type of food-borne illness. Mol Nutr Food Res 48:479-87.
- 441 4. Rajkovic A, Uyttendaele M, Vermeulen A, Andjelkovic M, Fitz-James I, in 't Veld P,  
442 Denon Q, Verhe R, Debevere J. 2008. Heat resistance of *Bacillus cereus* emetic toxin,  
443 cereulide. Lett Appl Microbiol 46:536-41.
- 444 5. Messelhäuser U, Ehling-Schulz M. 2018. *Bacillus cereus*—a Multifaceted Opportunistic  
445 Pathogen. Current Clinical Microbiology Reports 5:120-125.
- 446 6. Schoeni JL, Wong AC. 2005. *Bacillus cereus* food poisoning and its toxins. J Food Prot  
447 68:636-48.
- 448 7. Carroll LM, Wiedmann M, Mukherjee M, Nicholas DC, Mingle LA, Dumas NB, Cole  
449 JA, Kovac J. 2019. Characterization of Emetic and Diarrheal *Bacillus cereus* Strains  
450 From a 2016 Foodborne Outbreak Using Whole-Genome Sequencing: Addressing the  
451 Microbiological, Epidemiological, and Bioinformatic Challenges. Front Microbiol  
452 10:144.

- 453 8. Glasset B, Herbin S, Guillier L, Cadel-Six S, Vignaud ML, Grout J, Pairaud S, Michel V,  
454 Hennekinne JA, Ramarao N, Brisabois A. 2016. *Bacillus cereus*-induced food-borne  
455 outbreaks in France, 2007 to 2014: epidemiology and genetic characterisation. Euro  
456 Surveill 21.
- 457 9. Ehling-Schulz M, Fricker M, Grallert H, Rieck P, Wagner M, Scherer S. 2006. Cereulide  
458 synthetase gene cluster from emetic *Bacillus cereus*: structure and location on a mega  
459 virulence plasmid related to *Bacillus anthracis* toxin plasmid pXO1. BMC Microbiol  
460 6:20.
- 461 10. Ehling-Schulz M, Frenzel E, Gohar M. 2015. Food-bacteria interplay: pathometabolism  
462 of emetic *Bacillus cereus*. Front Microbiol 6:704.
- 463 11. Guinebretiere MH, Thompson FL, Sorokin A, Normand P, Dawyndt P, Ehling-Schulz M,  
464 Svensson B, Sanchis V, Nguyen-The C, Heyndrickx M, De Vos P. 2008. Ecological  
465 diversification in the *Bacillus cereus* Group. Environ Microbiol 10:851-65.
- 466 12. Guinebretiere MH, Velge P, Couvert O, Carlin F, Debuyser ML, Nguyen-The C. 2010.  
467 Ability of *Bacillus cereus* group strains to cause food poisoning varies according to  
468 phylogenetic affiliation (groups I to VII) rather than species affiliation. J Clin Microbiol  
469 48:3388-91.
- 470 13. Carroll LM, Kovac J, Miller RA, Wiedmann M. 2017. Rapid, high-throughput  
471 identification of anthrax-causing and emetic *Bacillus cereus* group genome assemblies  
472 using BTyper, a computational tool for virulence-based classification of *Bacillus cereus*  
473 group isolates using nucleotide sequencing data. Appl Environ Microbiol  
474 doi:10.1128/AEM.01096-17.

- 475 14. Hoton FM, Fornelos N, N'Guessan E, Hu X, Swiecicka I, Dierick K, Jaaskelainen E,  
476 Salkinoja-Salonen M, Mahillon J. 2009. Family portrait of *Bacillus cereus* and *Bacillus*  
477 *weihenstephanensis* cereulide-producing strains. *Environ Microbiol Rep* 1:177-83.
- 478 15. Guerin A, Ronning HT, Dargaignaratz C, Clavel T, Broussolle V, Mahillon J, Granum  
479 PE, Nguyen-The C. 2017. Cereulide production by *Bacillus weihenstephanensis* strains  
480 during growth at different pH values and temperatures. *Food Microbiol* 65:130-135.
- 481 16. Ehling-Schulz M, Svensson B, Guinebretiere MH, Lindback T, Andersson M, Schulz A,  
482 Fricker M, Christiansson A, Granum PE, Martlbauer E, Nguyen-The C, Salkinoja-  
483 Salonen M, Scherer S. 2005. Emetic toxin formation of *Bacillus cereus* is restricted to a  
484 single evolutionary lineage of closely related strains. *Microbiology* 151:183-197.
- 485 17. Thorsen L, Hansen BM, Nielsen KF, Hendriksen NB, Phipps RK, Budde BB. 2006.  
486 Characterization of emetic *Bacillus weihenstephanensis*, a new cereulide-producing  
487 bacterium. *Appl Environ Microbiol* 72:5118-21.
- 488 18. Castiaux V, N'Guessan E, Swiecicka I, Delbrassinne L, Dierick K, Mahillon J. 2014.  
489 Diversity of pulsed-field gel electrophoresis patterns of cereulide-producing isolates of  
490 *Bacillus cereus* and *Bacillus weihenstephanensis*. *FEMS Microbiol Lett* 353:124-31.
- 491 19. Mei X, Xu K, Yang L, Yuan Z, Mahillon J, Hu X. 2014. The genetic diversity of  
492 cereulide biosynthesis gene cluster indicates a composite transposon Tnces in emetic  
493 *Bacillus weihenstephanensis*. *BMC Microbiol* 14:149.
- 494 20. Tewari A, Abdullah S. 2015. *Bacillus cereus* food poisoning: international and Indian  
495 perspective. *J Food Sci Technol* 52:2500-11.

- 496 21. Carroll LM, Wiedmann M, Kovac J. 2020. Proposal of a Taxonomic Nomenclature for  
497 the *Bacillus cereus* Group Which Reconciles Genomic Definitions of Bacterial Species  
498 with Clinical and Industrial Phenotypes. mBio 11.
- 499 22. Arevalo P, VanInsberghe D, Elsherbini J, Gore J, Polz MF. 2019. A Reverse Ecology  
500 Approach Based on a Biological Definition of Microbial Populations. Cell 178:820-834  
501 e14.
- 502 23. Miller RA, Beno SM, Kent DJ, Carroll LM, Martin NH, Boor KJ, Kovac J. 2016.  
503 *Bacillus wiedmannii* sp. nov., a psychrotolerant and cytotoxic *Bacillus cereus* group  
504 species isolated from dairy foods and dairy environments. Int J Syst Evol Microbiol  
505 66:4744-4753.
- 506 24. Jimenez G, Urdiain M, Cifuentes A, Lopez-Lopez A, Blanch AR, Tamames J, Kampfer  
507 P, Kolsto AB, Ramon D, Martinez JF, Codoner FM, Rossello-Mora R. 2013. Description  
508 of *Bacillus toyonensis* sp. nov., a novel species of the *Bacillus cereus* group, and pairwise  
509 genome comparisons of the species of the group by means of ANI calculations. Syst Appl  
510 Microbiol 36:383-91.
- 511 25. Guinebretiere MH, Auger S, Galleron N, Contzen M, De Sarrau B, De Buyser ML,  
512 Lamberet G, Fagerlund A, Granum PE, Lereclus D, De Vos P, Nguyen-The C, Sorokin  
513 A. 2013. *Bacillus cytotoxicus* sp. nov. is a novel thermotolerant species of the *Bacillus*  
514 *cereus* Group occasionally associated with food poisoning. Int J Syst Evol Microbiol  
515 63:31-40.
- 516 26. Liu Y, Du J, Lai Q, Zeng R, Ye D, Xu J, Shao Z. 2017. Proposal of nine novel species of  
517 the *Bacillus cereus* group. Int J Syst Evol Microbiol 67:2499-2508.



- 518 27. Naranjo M, Denayer S, Botteldoorn N, Delbrassinne L, Veys J, Waegenaere J, Sirtaine N,  
519 Driesen RB, Sipido KR, Mahillon J, Dierick K. 2011. Sudden death of a young adult  
520 associated with *Bacillus cereus* food poisoning. J Clin Microbiol 49:4379-81.
- 521 28. Dierick K, Van Coillie E, Swiecicka I, Meyfroidt G, Devlieger H, Meulemans A,  
522 Hoedemaekers G, Fourie L, Heyndrickx M, Mahillon J. 2005. Fatal family outbreak of  
523 *Bacillus cereus*-associated food poisoning. J Clin Microbiol 43:4277-9.
- 524 29. Mahler H, Pasi A, Kramer JM, Schulte P, Scoging AC, Bar W, Krahenbuhl S. 1997.  
525 Fulminant liver failure in association with the emetic toxin of *Bacillus cereus*. N Engl J  
526 Med 336:1142-8.
- 527 30. Posfay-Barbe KM, Schrenzel J, Frey J, Studer R, Korff C, Belli DC, Parvex P,  
528 Rimensberger PC, Schappi MG. 2008. Food poisoning as a cause of acute liver failure.  
529 Pediatr Infect Dis J 27:846-7.
- 530 31. Shiota M, Saitou K, Mizumoto H, Matsusaka M, Agata N, Nakayama M, Kage M,  
531 Tatsumi S, Okamoto A, Yamaguchi S, Ohta M, Hata D. 2010. Rapid detoxification of  
532 cereulide in *Bacillus cereus* food poisoning. Pediatrics 125:e951-5.
- 533 32. Yang Y, Gu H, Yu X, Zhan L, Chen J, Luo Y, Zhang Y, Zhang Y, Lu Y, Jiang J, Mei L.  
534 2017. Genotypic heterogeneity of emetic toxin producing *Bacillus cereus* isolates from  
535 China. FEMS Microbiol Lett 364.
- 536 33. Vassileva M, Torii K, Oshimoto M, Okamoto A, Agata N, Yamada K, Hasegawa T, Ohta  
537 M. 2007. A new phylogenetic cluster of cereulide-producing *Bacillus cereus* strains. J  
538 Clin Microbiol 45:1274-7.

- 539 34. Apetroaie C, Andersson MA, Sproer C, Tsitko I, Shaheen R, Jaaskelainen EL, Wijnands  
540 LM, Heikkila R, Salkinoja-Salonen MS. 2005. Cereulide-producing strains of *Bacillus*  
541 *cereus* show diversity. Arch Microbiol 184:141-51.
- 542 35. Jain C, Rodriguez RL, Phillippy AM, Konstantinidis KT, Aluru S. 2018. High throughput  
543 ANI analysis of 90K prokaryotic genomes reveals clear species boundaries. Nat Commun  
544 9:5114.
- 545 36. Worley J, Meng J, Allard MW, Brown EW, Timme RE. 2018. *Salmonella enterica*  
546 Phylogeny Based on Whole-Genome Sequencing Reveals Two New Clades and Novel  
547 Patterns of Horizontally Acquired Genetic Elements. MBio 9.
- 548 37. Usongo V, Berry C, Yousfi K, Doualla-Bell F, Labbe G, Johnson R, Fournier E, Nadon  
549 C, Goodridge L, Bekal S. 2018. Impact of the choice of reference genome on the ability  
550 of the core genome SNV methodology to distinguish strains of *Salmonella enterica*  
551 serovar Heidelberg. PLoS One 13:e0192233.
- 552 38. Olson ND, Lund SP, Colman RE, Foster JT, Sahl JW, Schupp JM, Keim P, Morrow JB,  
553 Salit ML, Zook JM. 2015. Best practices for evaluating single nucleotide variant calling  
554 methods for microbial genomics. Front Genet 6:235.
- 555 39. Pightling AW, Petronella N, Pagotto F. 2014. Choice of reference sequence and  
556 assembler for alignment of *Listeria monocytogenes* short-read sequence data greatly  
557 influences rates of error in SNP analyses. PLoS One 9:e104579.
- 558 40. Pightling AW, Petronella N, Pagotto F. 2015. Choice of reference-guided sequence  
559 assembler and SNP caller for analysis of *Listeria monocytogenes* short-read sequence  
560 data greatly influences rates of error. BMC Res Notes 8:748.

- 561 41. HAUGE S. 1955. FOOD POISONING CAUSED BY AEROBIC SPORE-FORMING  
562 BACILLI. *Journal of Applied Bacteriology* 18:591-595.
- 563 42. Priest FG, Barker M, Baillie LW, Holmes EC, Maiden MC. 2004. Population structure  
564 and evolution of the *Bacillus cereus* group. *J Bacteriol* 186:7959-70.
- 565 43. Hoffmaster AR, Novak RT, Marston CK, Gee JE, Helsel L, Pruckler JM, Wilkins PP.  
566 2008. Genetic diversity of clinical isolates of *Bacillus cereus* using multilocus sequence  
567 typing. *BMC Microbiol* 8:191.
- 568 44. Granum PE, Lund T. 1997. *Bacillus cereus* and its food poisoning toxins. *FEMS*  
569 *Microbiol Lett* 157:223-8.
- 570 45. Jessberger N, Krey VM, Rademacher C, Bohm ME, Mohr AK, Ehling-Schulz M, Scherer  
571 S, Martlbauer E. 2015. From genome to toxicity: a combinatory approach highlights the  
572 complexity of enterotoxin production in *Bacillus cereus*. *Front Microbiol* 6:560.
- 573 46. Riol CD, Dietrich R, Martlbauer E, Jessberger N. 2018. Consumed Foodstuffs Have a  
574 Crucial Impact on the Toxic Activity of Enteropathogenic *Bacillus cereus*. *Front*  
575 *Microbiol* 9:1946.
- 576 47. Hoton FM, Andrup L, Swiecicka I, Mahillon J. 2005. The cereulide genetic determinants  
577 of emetic *Bacillus cereus* are plasmid-borne. *Microbiology* 151:2121-2124.
- 578 48. Gdoura-Ben Amor M, Siala M, Zayani M, Grosset N, Smaoui S, Messadi-Akrout F,  
579 Baron F, Jan S, Gautier M, Gdoura R. 2018. Isolation, Identification, Prevalence, and  
580 Genetic Diversity of *Bacillus cereus* Group Bacteria From Different Foodstuffs in  
581 Tunisia. *Front Microbiol* 9:447.

- 582 49. Zhuang K, Li H, Zhang Z, Wu S, Zhang Y, Fox EM, Man C, Jiang Y. 2019. Typing and  
583 evaluating heat resistance of *Bacillus cereus sensu stricto* isolated from the processing  
584 environment of powdered infant formula. *J Dairy Sci* 102:7781-7793.
- 585 50. Glasset B, Herbin S, Granier SA, Cavalie L, Lafeuille E, Guerin C, Ruimy R,  
586 Casagrande-Magne F, Levast M, Chautemps N, Decousser JW, Belotti L, Pelloux I,  
587 Robert J, Brisabois A, Ramarao N. 2018. *Bacillus cereus*, a serious cause of nosocomial  
588 infections: Epidemiologic and genetic survey. *PLoS One* 13:e0194346.
- 589 51. Bukharin OV, Perunova NB, Andryuschenko SV, Ivanova EV, Bondarenko TA,  
590 Chainikova IN. 2019. Genome Sequence Announcement of *Bacillus paranthracis* Strain  
591 ICIS-279, Isolated from Human Intestine. *Microbiol Resour Announc* 8.
- 592 52. Pruitt KD, Tatusova T, Maglott DR. 2007. NCBI reference sequences (RefSeq): a curated  
593 non-redundant sequence database of genomes, transcripts and proteins. *Nucleic Acids*  
594 *Res* 35:D61-5.
- 595 53. Lechner S, Mayr R, Francis KP, Pruss BM, Kaplan T, Wiessner-Gunkel E, Stewart GS,  
596 Scherer S. 1998. *Bacillus weihenstephanensis* sp. nov. is a new psychrotolerant species of  
597 the *Bacillus cereus* group. *Int J Syst Bacteriol* 48 Pt 4:1373-82.
- 598 54. Jolley KA, Maiden MC. 2010. BIGSdb: Scalable analysis of bacterial genome variation  
599 at the population level. *BMC Bioinformatics* 11:595.
- 600 55. Gardner SN, Hall BG. 2013. When whole-genome alignments just won't work: kSNP v2  
601 software for alignment-free SNP discovery and phylogenetics of hundreds of microbial  
602 genomes. *PLoS One* 8:e81760.

- 603 56. Gardner SN, Slezak T, Hall BG. 2015. kSNP3.0: SNP detection and phylogenetic  
604 analysis of genomes without genome alignment or reference genome. *Bioinformatics*  
605 31:2877-8.
- 606 57. Nguyen LT, Schmidt HA, von Haeseler A, Minh BQ. 2015. IQ-TREE: a fast and  
607 effective stochastic algorithm for estimating maximum-likelihood phylogenies. *Mol Biol*  
608 *Evol* 32:268-74.
- 609 58. Kalyaanamoorthy S, Minh BQ, Wong TKF, von Haeseler A, Jermiin LS. 2017.  
610 ModelFinder: fast model selection for accurate phylogenetic estimates. *Nat Methods*  
611 14:587-589.
- 612 59. Minh BQ, Nguyen MA, von Haeseler A. 2013. Ultrafast approximation for phylogenetic  
613 bootstrap. *Mol Biol Evol* 30:1188-95.
- 614 60. Hoang DT, Chernomor O, von Haeseler A, Minh BQ, Vinh LS. 2018. UFBoot2:  
615 Improving the Ultrafast Bootstrap Approximation. *Mol Biol Evol* 35:518-522.
- 616 61. Revell LJ. 2012. phytools: an R package for phylogenetic comparative biology (and other  
617 things). *Methods in Ecology and Evolution* 3:217-223.
- 618 62. Tonkin-Hill G, Lees JA, Bentley SD, Frost SDW, Corander J. 2018. RhierBAPS: An R  
619 implementation of the population clustering algorithm hierBAPS. *Wellcome Open Res*  
620 3:93.
- 621 63. Seemann T. 2019. Snippy: Rapid haploid variant calling and core genome alignment,  
622 v4.3.6. <https://github.com/tseemann/snippy>.
- 623 64. Croucher NJ, Page AJ, Connor TR, Delaney AJ, Keane JA, Bentley SD, Parkhill J, Harris  
624 SR. 2015. Rapid phylogenetic analysis of large samples of recombinant bacterial whole  
625 genome sequences using Gubbins. *Nucleic Acids Res* 43:e15.

- 626 65. Page AJ, Taylor B, Delaney AJ, Soares J, Seemann T, Keane JA, Harris SR. 2016. SNP-  
627 sites: rapid efficient extraction of SNPs from multi-FASTA alignments. *Microb Genom*  
628 2:e000056.
- 629 66. Rambaut A, Lam TT, Max Carvalho L, Pybus OG. 2016. Exploring the temporal  
630 structure of heterochronous sequences using TempEst (formerly Path-O-Gen). *Virus Evol*  
631 2:vew007.
- 632 67. Bouckaert R, Vaughan TG, Barido-Sottani J, Duchene S, Fourment M, Gavryushkina A,  
633 Heled J, Jones G, Kuhnert D, De Maio N, Matschiner M, Mendes FK, Muller NF,  
634 Ogilvie HA, du Plessis L, Poppinga A, Rambaut A, Rasmussen D, Siveroni I, Suchard  
635 MA, Wu CH, Xie D, Zhang C, Stadler T, Drummond AJ. 2019. BEAST 2.5: An  
636 advanced software platform for Bayesian evolutionary analysis. *PLoS Comput Biol*  
637 15:e1006650.
- 638 68. Bouckaert R, Heled J, Kuhnert D, Vaughan T, Wu CH, Xie D, Suchard MA, Rambaut A,  
639 Drummond AJ. 2014. BEAST 2: a software platform for Bayesian evolutionary analysis.  
640 *PLoS Comput Biol* 10:e1003537.
- 641 69. Bouckaert R, Xie D. 2017. SSN: Standard Nucleotide Substitution Models,  
642 <http://doi.org/10.5281/zenodo.995740>.
- 643 70. Bouckaert R. 2014. Correcting for constant sites in BEAST2.  
644 <https://groups.google.com/forum/#!topic/beast-users/QfBHMOqImFE>. Accessed May 12,  
645 2020.
- 646 71. Drummond AJ, Ho SY, Phillips MJ, Rambaut A. 2006. Relaxed phylogenetics and dating  
647 with confidence. *PLoS Biol* 4:e88.

- 648 72. Stadler T, Kuhnert D, Bonhoeffer S, Drummond AJ. 2013. Birth-death skyline plot  
649 reveals temporal changes of epidemic spread in HIV and hepatitis C virus (HCV). *Proc*  
650 *Natl Acad Sci U S A* 110:228-33.
- 651 73. Rambaut A, Drummond AJ, Xie D, Baele G, Suchard MA. 2018. Posterior  
652 Summarization in Bayesian Phylogenetics Using Tracer 1.7. *Syst Biol* 67:901-904.
- 653 74. Heled J, Bouckaert RR. 2013. Looking for trees in the forest: summary tree from  
654 posterior samples. *BMC Evol Biol* 13:221.
- 655 75. Yoshimura D, Kajitani R, Gotoh Y, Katahira K, Okuno M, Ogura Y, Hayashi T, Itoh T.  
656 2019. Evaluation of SNP calling methods for closely related bacterial isolates and a novel  
657 high-accuracy pipeline: BactSNP. *Microb Genom* 5.
- 658 76. Katz LS, Griswold T, Williams-Newkirk AJ, Wagner D, Petkau A, Sieffert C, Van  
659 Domselaar G, Deng X, Carleton HA. 2017. A Comparative Analysis of the Lyve-SET  
660 Phylogenomics Pipeline for Genomic Epidemiology of Foodborne Pathogens. *Front*  
661 *Microbiol* 8:375.
- 662 77. Treangen TJ, Ondov BD, Koren S, Phillippy AM. 2014. The Harvest suite for rapid core-  
663 genome alignment and visualization of thousands of intraspecific microbial genomes.  
664 *Genome Biol* 15:524.
- 665 78. Bruen TC, Philippe H, Bryant D. 2006. A simple and robust statistical test for detecting  
666 the presence of recombination. *Genetics* 172:2665-81.
- 667 79. Kendall M, Colijn C. 2016. Mapping Phylogenetic Trees to Reveal Distinct Patterns of  
668 Evolution. *Molecular Biology and Evolution* 33:2735-2743.
- 669 80. Kendall M, Colijn C. 2015. A tree metric using structure and length to capture distinct  
670 phylogenetic signals. *arXiv:1507.05211*.

- 671 81. Zwick ME, Joseph SJ, Didelot X, Chen PE, Bishop-Lilly KA, Stewart AC, Willner K,  
672 Nolan N, Lentz S, Thomason MK, Sozhamannan S, Mateczun AJ, Du L, Read TD. 2012.  
673 Genomic characterization of the *Bacillus cereus sensu lato* species: backdrop to the  
674 evolution of *Bacillus anthracis*. *Genome Res* 22:1512-24.
- 675 82. Xiong Z, Jiang Y, Qi D, Lu H, Yang F, Yang J, Chen L, Sun L, Xu X, Xue Y, Zhu Y, Jin  
676 Q. 2009. Complete genome sequence of the extremophilic *Bacillus cereus* strain Q1 with  
677 industrial applications. *J Bacteriol* 191:1120-1.
- 678 83. Ji F, Zhu Y, Ju S, Zhang R, Yu Z, Sun M. 2009. Promoters of crystal protein genes do not  
679 control crystal formation inside exosporium of *Bacillus thuringiensis* ssp. *finitimus* strain  
680 YBT-020. *FEMS Microbiol Lett* 300:11-7.
- 681 84. Guo G, Zhang L, Zhou Z, Ma Q, Liu J, Zhu C, Zhu L, Yu Z, Sun M. 2008. A new group  
682 of parasporal inclusions encoded by the S-layer gene of *Bacillus thuringiensis*. *FEMS*  
683 *Microbiol Lett* 282:1-7.
- 684 85. Zhu Y, Ji F, Shang H, Zhu Q, Wang P, Xu C, Deng Y, Peng D, Ruan L, Sun M. 2011.  
685 Gene clusters located on two large plasmids determine spore crystal association (SCA) in  
686 *Bacillus thuringiensis* subsp. *finitimus* strain YBT-020. *PLoS One* 6:e27164.
- 687 86. Zhu Y, Shang H, Zhu Q, Ji F, Wang P, Fu J, Deng Y, Xu C, Ye W, Zheng J, Zhu L, Ruan  
688 L, Peng D, Sun M. 2011. Complete genome sequence of *Bacillus thuringiensis* serovar  
689 *finitimus* strain YBT-020. *J Bacteriol* 193:2379-80.
- 690 87. Fiedoruk K, Daniluk T, Fiodor A, Drewicka E, Buczynska K, Leszczynska K, Bideshi  
691 DK, Swiecicka I. 2016. MALDI-TOF MS portrait of emetic and non-emetic *Bacillus*  
692 *cereus* group members. *Electrophoresis* 37:2235-47.



- 693 88. Su L, Zhou T, Zhou L, Fang X, Li T, Wang J, Guo Y, Chang D, Wang Y, Li D, Liu C.  
694 2012. Draft genome sequence of *Bacillus cereus* strain LCT-BC244. *J Bacteriol*  
695 194:3549.
- 696 89. Agata N, Mori M, Ohta M, Suwan S, Ohtani I, Isobe M. 1994. A novel  
697 dodecadepsipeptide, cereulide, isolated from *Bacillus cereus* causes vacuole formation in  
698 HEp-2 cells. *FEMS Microbiol Lett* 121:31-4.
- 699 90. Ekman JV, Kruglov A, Andersson MA, Mikkola R, Raulio M, Salkinoja-Salonen M.  
700 2012. Cereulide produced by *Bacillus cereus* increases the fitness of the producer  
701 organism in low-potassium environments. *Microbiology* 158:1106-1116.
- 702 91. Takeno A, Okamoto A, Tori K, Oshima K, Hirakawa H, Toh H, Agata N, Yamada K,  
703 Ogasawara N, Hayashi T, Shimizu T, Kuhara S, Hattori M, Ohta M. 2012. Complete  
704 genome sequence of *Bacillus cereus* NC7401, which produces high levels of the emetic  
705 toxin cereulide. *J Bacteriol* 194:4767-8.
- 706 92. Hu X, Van der Auwera G, Timmery S, Zhu L, Mahillon J. 2009. Distribution, diversity,  
707 and potential mobility of extrachromosomal elements related to the *Bacillus anthracis*  
708 pXO1 and pXO2 virulence plasmids. *Appl Environ Microbiol* 75:3016-28.
- 709 93. Van der Auwera GA, Feldgarden M, Kolter R, Mahillon J. 2013. Whole-Genome  
710 Sequences of 94 Environmental Isolates of *Bacillus cereus Sensu Lato*. *Genome Announc*  
711 1.
- 712 94. Swiecicka I, De Vos P. 2003. Properties of *Bacillus thuringiensis* isolated from bank  
713 voles. *J Appl Microbiol* 94:60-4.
- 714 95. Biodefense and Emerging Infections (BEI) Research Resources Repository. 2019.  
715 *Bacillus cereus* Strain AND1407, NR-22159.

- 716 <https://www.beiresources.org/Catalog/Bacteria/NR-22159.aspx>. Accessed December 24,  
717 2019.
- 718 96. Timmery S, Hu X, Mahillon J. 2011. Characterization of Bacilli isolated from the  
719 confined environments of the Antarctic Concordia station and the International Space  
720 Station. *Astrobiology* 11:323-34.
- 721 97. Zhang X, Wang T, Su L, Zhou L, Li T, Wang J, Liu Y, Jiang X, Wu C, Liu C. 2014.  
722 Draft Genome Sequence of *Bacillus cereus* LCT-BC25, Isolated from Space Flight.  
723 *Genome Announc* 2.
- 724 98. Su L, Wang T, Zhou L, Wu C, Guo Y, Chang D, Liu Y, Jiang X, Yin S, Liu C. 2014.  
725 Genome Sequence of *Bacillus cereus* Strain LCT-BC235, Carried by the Shenzhou VIII  
726 Spacecraft. *Genome Announc* 2.
- 727 99. Radnedge L, Agron PG, Hill KK, Jackson PJ, Ticknor LO, Keim P, Andersen GL. 2003.  
728 Genome differences that distinguish *Bacillus anthracis* from *Bacillus cereus* and *Bacillus*  
729 *thuringiensis*. *Appl Environ Microbiol* 69:2755-64.
- 730 100. Zhong W, Shou Y, Yoshida TM, Marrone BL. 2007. Differentiation of *Bacillus*  
731 *anthracis*, *B. cereus*, and *B. thuringiensis* by using pulsed-field gel electrophoresis. *Appl*  
732 *Environ Microbiol* 73:3446-9.
- 733 101. Pannucci J, Okinaka RT, Sabin R, Kuske CR. 2002. *Bacillus anthracis* pXO1 plasmid  
734 sequence conservation among closely related bacterial species. *J Bacteriol* 184:134-41.
- 735 102. Knight BC, Proom H. 1950. A comparative survey of the nutrition and physiology of  
736 mesophilic species in the genus *Bacillus*. *J Gen Microbiol* 4:508-38.
- 737 103. Sneath PH. 1955. Proof of the spontaneity of a mutation to penicillinase production in  
738 *Bacillus cereus*. *J Gen Microbiol* 13:561-8.

- 739 104. Fenselau C, Havey C, Teerakulkittipong N, Swatkoski S, Laine O, Edwards N. 2008.  
740 Identification of beta-lactamase in antibiotic-resistant *Bacillus cereus* spores. Appl  
741 Environ Microbiol 74:904-6.
- 742 105. Krawczyk AO, de Jong A, Eijlander RT, Berendsen EM, Holsappel S, Wells-Bennik  
743 MH, Kuipers OP. 2015. Next-Generation Whole-Genome Sequencing of Eight Strains of  
744 *Bacillus cereus*, Isolated from Food. Genome Announc 3.
- 745 106. Bohm ME, Huptas C, Krey VM, Scherer S. 2015. Massive horizontal gene transfer,  
746 strictly vertical inheritance and ancient duplications differentially shape the evolution of  
747 *Bacillus cereus* enterotoxin operons *hbl*, *cytK* and *nhe*. BMC Evol Biol 15:246.
- 748 107. Crovadore J, Calmin G, Tonacini J, Chablais R, Schnyder B, Messelhauser U, Lefort F.  
749 2016. Whole-Genome Sequences of Seven Strains of *Bacillus cereus* Isolated from  
750 Foodstuff or Poisoning Incidents. Genome Announc 4.
- 751 108. Miller RA, Jian J, Beno SM, Wiedmann M, Kovac J. 2018. Intraclade Variability in  
752 Toxin Production and Cytotoxicity of *Bacillus cereus* Group Type Strains and Dairy-  
753 Associated Isolates. Appl Environ Microbiol 84.
- 754 109. Kovac J, Miller RA, Carroll LM, Kent DJ, Jian J, Beno SM, Wiedmann M. 2016.  
755 Production of hemolysin BL by *Bacillus cereus* group isolates of dairy origin is  
756 associated with whole-genome phylogenetic clade. BMC Genomics 17:581.
- 757 110. Hayrapetyan H, Boekhorst J, de Jong A, Kuipers OP, Nierop Groot MN, Abee T. 2016.  
758 Draft Whole-Genome Sequences of 11 *Bacillus cereus* Food Isolates. Genome Announc  
759 4.

- 760 111. Zeigler DR. 1999. *Bacillus* Genetic Stock Center Catalog of Strains, Seventh Edition,  
761 Part 2: *Bacillus thuringiensis* and *Bacillus cereus* 7th ed. The *Bacillus* Genetic Stock  
762 Center, The Ohio State University, Columbus, Ohio.
- 763 112. Raymond B. 2017. The Biology, Ecology and Taxonomy of *Bacillus thuringiensis* and  
764 Related Bacteria, p 19-39. In Fiuza LM, Polanczyk RA, Crickmore N (ed), *Bacillus*  
765 *thuringiensis* and *Lysinibacillus sphaericus*: Characterization and use in the field of  
766 biocontrol doi:10.1007/978-3-319-56678-8\_2. Springer International Publishing, Cham.
- 767 113. Liu M, Cai QX, Liu HZ, Zhang BH, Yan JP, Yuan ZM. 2002. Chitinolytic activities in  
768 *Bacillus thuringiensis* and their synergistic effects on larvicidal activity. *J Appl Microbiol*  
769 93:374-9.
- 770 114. Che L, Xu W, Zhan J, Zhang L, Liu L, Zhou H. 2019. Complete Genome Sequence of  
771 *Bacillus cereus* CC-1, A Novel Marine Selenate/Selenite Reducing Bacterium Producing  
772 Metallic Selenides Nanomaterials. *Curr Microbiol* 76:78-85.
- 773 115. Grubbs KJ, Bleich RM, Santa Maria KC, Allen SE, Farag S, AgBiome T, Shank EA,  
774 Bowers AA. 2017. Large-Scale Bioinformatics Analysis of *Bacillus* Genomes Uncovers  
775 Conserved Roles of Natural Products in Bacterial Physiology. *mSystems* 2.
- 776 116. Chang T, Rosch JW, Gu Z, Hakim H, Hewitt C, Gaur A, Wu G, Hayden RT. 2018.  
777 Whole-Genome Characterization of *Bacillus cereus* Associated with Specific Disease  
778 Manifestations. *Infect Immun* 86.
- 779 117. Shankar M, Mageswari A, Suganthi C, Gunasekaran P, Gothandam KM, Karthikeyan S.  
780 2018. Genome Sequence of a Moderately Halophilic *Bacillus cereus* Strain, TS2, Isolated  
781 from Saltern Sediments. *Microbiol Resour Announc* 7.

782 118. Ikram S, Heikal A, Finke S, Hofgaard A, Rehman Y, Sabri AN, Okstad OA. 2019.  
783 *Bacillus cereus* biofilm formation on central venous catheters of hospitalised cardiac  
784 patients. *Biofouling* 35:204-216.  
785  
786  
787

## 788 TABLES

789

790 **Table 1.** Topological comparisons of *B. cereus s.l.* ST 26 phylogenies constructed using various SNP calling pipeline/reference  
791 genome combinations.

| Strain             | Reference Genomes     |                 |                      |                               | Kendall-Colijn Test P-values |          |        |                 |
|--------------------|-----------------------|-----------------|----------------------|-------------------------------|------------------------------|----------|--------|-----------------|
|                    | NCBI RefSeq Accession | Assembly Level  | MLST ST <sup>a</sup> | ANI Range (Mean) <sup>b</sup> | BactSNP                      | Lyve-SET | Parsnp | Snippy          |
| AH187 <sup>c</sup> | NC_011658.1           | Complete Genome | 26                   | 99.8-100.0 (99.9)             | 0                            | 0        | 0      | 0               |
| IS195              | GCF_000399225.1       | Scaffold        | 26                   | 99.6-100.0 (99.7)             | 0                            | 0        | 0      | 0               |
| AND1407            | GCF_000290995.1       | Scaffold        | 164                  | 98.9-99.2 (99.1)              | 0                            | 0        | 0      | 0               |
| MB.17              | GCF_001566445.1       | Contigs         | 144                  | 98.8-99.1 (99.0)              | 0                            | 0        | 1.0    | 1.0             |
| MB.18              | GCF_001566385.1       | Contigs         | 2056                 | 97.4-97.8 (97.6)              | NA <sup>d</sup>              | 0        | 0      | 0               |
| MB.22              | GCF_001566535.1       | Contigs         | 869                  | 97.4-97.7 (97.6)              | NA <sup>e</sup>              | 0        | 0      | NA <sup>e</sup> |

792 <sup>a</sup>Seven-gene multi-locus sequence typing (MLST) sequence type (ST) determined *in silico* using BTyper v. 2.3.3

793 <sup>b</sup>Range and mean of average nucleotide identity (ANI) values calculated between the respective reference genome and all 64 Group III *B. cereus s.l.* genomes  
794 assigned to ST 26, calculated using FastANI v. 1.0

795 <sup>c</sup>For each reference-based SNP calling pipeline (i.e., BactSNP, Lyve-SET, Parsnp, Snippy), the phylogeny produced using SNPs identified among 64 *B. cereus*  
796 *s.l.* ST 26 isolates using the respective SNP calling pipeline and the chromosome of *B. cereus s.l.* ST 26 str. AH187 as a reference genome was used a reference  
797 tree for the Kendall-Colijn test, as the chromosome of str. AH187 has been shown to be an adequate reference genome for reference-based SNP calling among  
798 emetic ST 26 genomes (7)

799 <sup>d</sup>No SNPs could be identified among the 64 *B. cereus s.l.* ST 26 genomes using the respective SNP calling pipeline/reference genome combination

800 <sup>e</sup>SNPs identified using the respective SNP calling pipeline/reference genome combination were not diverse enough for use with Gubbins/IQ-TREE

801

802 **Table 2.** Pairwise SNP differences calculated between 64 *B. cereus s.l.* ST 26 isolates, including 30 emetic isolates from a 2016  
 803 foodborne outbreak in New York State (NYS), using various SNP calling pipeline/reference genome combinations.

| SNP Calling Pipeline | Reference Strain   | MLST ST <sup>a</sup> | ANI Range (Mean) <sup>b</sup> | Within NYS Outbreak Range (Median; Mean) | Between NYS Outbreak and Non-NYS Outbreak Range (Median; Mean) | Within Non-NYS Outbreak Range (Median; Mean) | Min(Between Outbreak)-Max(Within Outbreak) <sup>c</sup> |
|----------------------|--------------------|----------------------|-------------------------------|------------------------------------------|----------------------------------------------------------------|----------------------------------------------|---------------------------------------------------------|
| <i>BactSNP</i>       |                    |                      |                               |                                          |                                                                |                                              |                                                         |
|                      | AH187 <sup>d</sup> | 26                   | 99.8-100.0 (99.9)             | 0-8 (2; 2.7)                             | 58-381 (127; 149.6)                                            | 0-477 (162; 183.3)                           | 50                                                      |
|                      | IS195              | 26                   | 99.6-100.0 (99.7)             | 0-8 (2; 2.7)                             | 58-385 (128; 153.9)                                            | 0-483 (167; 187.7)                           | 50                                                      |
|                      | AND1407            | 164                  | 98.9-99.2 (99.1)              | 0-8 (2; 2.7)                             | 56-378 (125; 147.3)                                            | 0-472 (157; 178.1)                           | 48                                                      |
|                      | MB.17              | 144                  | 98.8-99.1 (99.0)              | 0-7 (2; 2.3)                             | 57-370 (123; 144.3)                                            | 0-448 (153; 175.3)                           | 50                                                      |
|                      | MB.18              | 2056                 | 97.4-97.8 (97.6)              | NA <sup>e</sup>                          | NA <sup>e</sup>                                                | NA <sup>e</sup>                              | NA <sup>e</sup>                                         |
|                      | MB.22              | 869                  | 97.4-97.7 (97.6)              | NA <sup>f</sup>                          | NA <sup>f</sup>                                                | NA <sup>f</sup>                              | NA <sup>f</sup>                                         |
| <i>Lyve-SET</i>      |                    |                      |                               |                                          |                                                                |                                              |                                                         |
|                      | AH187 <sup>d</sup> | 26                   | 99.8-100.0 (99.9)             | 0-7 (2; 2.6)                             | 61-1840 (169; 510.4)                                           | 0-2246 (198; 520.9)                          | 54                                                      |
|                      | IS195              | 26                   | 99.6-100.0 (99.7)             | 0-6 (2; 2.3)                             | 61-1421 (174; 428.1)                                           | 0-1834 (192; 447.7)                          | 55                                                      |
|                      | AND1407            | 164                  | 98.9-99.2 (99.1)              | 0-5 (2; 2.3)                             | 56-1622 (147; 449.0)                                           | 0-1943 (167; 451.7)                          | 51                                                      |
|                      | MB.17              | 144                  | 98.8-99.1 (99.0)              | 0-5 (2; 2.0)                             | 56-1479 (144; 419.2)                                           | 0-1830 (168; 429.7)                          | 51                                                      |
|                      | MB.18              | 2056                 | 97.4-97.8 (97.6)              | 0-4 (1; 1.6)                             | 47-1336 (114; 367.2)                                           | 0-1578 (126; 363.0)                          | 43                                                      |
|                      | MB.22              | 869                  | 97.4-97.7 (97.6)              | 0-4 (1; 1.6)                             | 44-1323 (115; 363.3)                                           | 0-1576 (127; 360.0)                          | 40                                                      |
| <i>Parsnp</i>        |                    |                      |                               |                                          |                                                                |                                              |                                                         |
|                      | AH187 <sup>d</sup> | 26                   | 99.8-100.0 (99.9)             | 0-44 (9; 12.0)                           | 59-2404 (190; 697.4)                                           | 0-3250 (260; 754.1)                          | 15                                                      |
|                      | IS195              | 26                   | 99.6-100.0 (99.7)             | 0-43 (9; 12.1)                           | 62-2414 (209; 705.3)                                           | 0-3280 (269; 762)                            | 19                                                      |
|                      | AND1407            | 164                  | 98.9-99.2 (99.1)              | 0-44 (9; 11.8)                           | 59-2399 (185; 642.9)                                           | 0-2832 (249-647.1)                           | 15                                                      |
|                      | MB.17              | 144                  | 98.8-99.1 (99.0)              | 0-42 (9; 11.8)                           | 63-2130 (189; 583.5)                                           | 0-2527 (245; 585.9)                          | 21                                                      |
|                      | MB.18              | 2056                 | 97.4-97.8 (97.6)              | 0-41 (8; 10.6)                           | 56-2191 (170; 593)                                             | 0-2551 (226; 596.3)                          | 15                                                      |
|                      | MB.22              | 869                  | 97.4-97.7 (97.6)              | 0-37 (8; 10.5)                           | 57-2180 (167; 595.1)                                           | 0-2567 (227; 597.3)                          | 20                                                      |
| <i>Snippy</i>        |                    |                      |                               |                                          |                                                                |                                              |                                                         |
|                      | AH187 <sup>d</sup> | 26                   | 99.8-100.0 (99.9)             | 0-7 (2; 2.6)                             | 57-372 (146; 155.5)                                            | 0-444 (157; 177.6)                           | 50                                                      |
|                      | IS195              | 26                   | 99.6-100.0 (99.7)             | 0-7 (2; 2.6)                             | 58-370 (145; 153.6)                                            | 0-436 (157; 176.2)                           | 51                                                      |
|                      | AND1407            | 164                  | 98.9-99.2 (99.1)              | 0-18 (5; 4.9)                            | 55-368 (143; 152.9)                                            | 0-434 (156; 173)                             | 37                                                      |
|                      | MB.17              | 144                  | 98.8-99.1 (99.0)              | 0-20 (4; 4.4)                            | 60-373 (138; 151.8)                                            | 0-436 (153; 171.9)                           | 40                                                      |
|                      | MB.18              | 2056                 | 97.4-97.8 (97.6)              | 0-50 (5; 9.3)                            | 55-350 (128; 145.7)                                            | 0-401 (133; 159.5)                           | 5                                                       |
|                      | MB.22              | 869                  | 97.4-97.7 (97.6)              | NA <sup>f</sup>                          | NA <sup>f</sup>                                                | NA <sup>f</sup>                              | NA <sup>f</sup>                                         |

804 <sup>a</sup>Seven-gene multi-locus sequence typing (MLST) sequence type (ST) determined *in silico* using BTyper v. 2.3.3

805 <sup>b</sup>Range and mean of average nucleotide identity (ANI) values calculated between the respective reference genome and all 64 Group III *B. cereus s.l.* genomes  
 806 assigned to ST 26, calculated using FastANI v. 1.0

807 <sup>c</sup>Maximum no. of SNPs identified between two outbreak isolates, subtracted from the minimum no. of SNPs between an outbreak and non-outbreak isolate

808 <sup>d</sup>AH187 has previously been shown to be an adequate reference genome for reference-based SNP calling among emetic ST 26 genomes (7)

809 <sup>e</sup>No SNPs could be identified among the 64 *B. cereus s.l.* ST 26 genomes using the respective SNP calling pipeline/reference genome combination

810 <sup>f</sup>SNPs identified using the respective SNP calling pipeline/reference genome combination were not diverse enough for use with Gubbins/IQ-TREE

811 **FIGURE LEGENDS**

812

813 **Figure 1.** Maximum likelihood phylogeny constructed using core SNPs identified among 71  
814 emetic Group III *B. cereus s.l.* genomes and their closely related, non-emetic counterparts, plus  
815 outgroup genome *B. cereus s.l.* str. AFS057383. Tip labels of genomes possessing cereulide  
816 synthetase encoding genes *cesABCD* are annotated with a pink square. Clade labels correspond  
817 to (i) RhierBAPs level 2 cluster assignments, denoted as Cluster 1 to 9, with number of isolates  
818 assigned to a cluster (*n*) and sequence type (ST) determined using *in silico* multi-locus sequence  
819 typing (MLST) listed in parentheses; (ii) RhierBAPs level 1 cluster assignments, denoted as  
820 Cluster A, B, and C; (iii) PopCOGenT sub-cluster assignments, denoted as I and II. Tree edge  
821 and node colors correspond to the posterior probability (PP) of being in a *ces*-negative state,  
822 obtained using an empirical Bayes approach, in which a continuous-time reversible Markov  
823 model was fitted, followed by 1,000 simulations of stochastic character histories using the fitted  
824 model and tree tip states. Equal root node prior probabilities for *ces*-positive and *ces*-negative  
825 states were used. Node labels denote selected PP values, chosen for readability. The phylogeny  
826 was rooted along the outgroup genome, and branch lengths are reported in substitutions/site.

827 **Figure 2.** Pairwise average nucleotide identity (ANI) values calculated between Group III *B.*  
828 *cereus s.l.* genomes in which (i) both the query and reference genome lacked *cesABCD* (*ces*-  
829 negative; *n* = 90); (ii) both the query and reference genome possessed *cesABCD* (*ces*-positive; *n*  
830 = 60); (iii) the query genome possessed *cesABCD* and the reference genome lacked *cesABCD*  
831 and vice versa (mixed). Pairwise ANI values were calculated using FastANI version 1.0. Lower  
832 and upper box hinges correspond to the first and third quartiles, respectively. Lower and upper  
833 whiskers extend from the hinge to the smallest and largest values no more distant than 1.5 times



834 the interquartile range from the hinge, respectively. Points represent pairwise distances that fall  
835 beyond the ends of the whiskers.

836 **Figure 3.** Rooted, time-scaled maximum clade credibility (MCC) phylogeny constructed using core SNPs  
837 identified among 23 Group III *B. cereus s.l.* genomes belonging to sequence type (ST) 26. Tip label  
838 colors denote *ces*-positive (pink) and *ces*-negative (teal) genomes predicted to be capable and incapable of  
839 producing cereulide, respectively. Tip labels of isolates that could be associated with a known *B. cereus*  
840 *s.l.* illness in the literature (emetic, diarrheal, or stool colonization) are annotated on the right side with a  
841 pink, teal, or blue circle, respectively (note that additional isolates were associated with illness; however,  
842 these are not annotated, as the type of illness could not be confirmed from the available literature). Branch  
843 labels denote posterior probabilities of branch support. Time in years is plotted along the X-axis, with  
844 branch length reported in substitutions/site/year. Node bars denote 95% highest posterior density (HPD)  
845 intervals for common ancestor node heights. Core SNPs were identified using Snippy version 4.3.6. The  
846 phylogeny was constructed using the results of five independent runs using a relaxed lognormal clock  
847 model, the Standard\_TVMef nucleotide substitution model, and the Birth Death Skyline Serial population  
848 model implemented in BEAST version 2.5.1, with 10% burn-in applied to each run. LogCombiner-2 was  
849 used to combine BEAST 2 log files, and TreeAnnotator-2 was used to construct the phylogeny using  
850 common ancestor node heights.

851 **Figure 4.** Rooted, time-scaled maximum clade credibility (MCC) phylogeny constructed using  
852 core SNPs identified among 23 Group III *B. cereus s.l.* genomes belonging to sequence type (ST)  
853 26. Branch color corresponds to posterior density, denoting the probability of a lineage being in a  
854 *ces*-negative state as determined using ancestral state reconstruction. Pie charts at nodes denote  
855 the posterior probability (PP) of a node being in a *ces*-negative (teal) or *ces*-positive (pink) state.  
856 Arrows along branches denote a *ces* gain event. Labels along branches denote a *ces* gain or loss  
857 event (denoted by + *ces* or - *ces*, respectively). Node labels correspond to node ages in years,

858 while branch lengths are reported in substitutions/site/year. Core SNPs were identified using  
859 Snippy version 4.3.6. The phylogeny was constructed using the results of five independent runs  
860 using a relaxed lognormal clock model, the Standard\_TVMef nucleotide substitution model, and  
861 the Birth Death Skyline Serial population model implemented in BEAST version 2.5.1, with  
862 10% burn-in applied to each run. LogCombiner-2 was used to combine BEAST 2 log files, and  
863 TreeAnnotator-2 was used to construct the phylogeny using common ancestor node heights.  
864 Ancestral state reconstruction was performed using a prior on the root node in which the  
865 probability of the ST 26 ancestor being *ces*-positive or *ces*-negative was estimated using the  
866 `make.simmmap` function in the `phytools` package in R. For ancestral state reconstruction results  
867 obtained using different root node priors, see Supplemental Figure S3.

868

869

870

871 **SUPPLEMENTAL MATERIAL LEGENDS**

872 **Supplemental Figure S1.** Maximum likelihood phylogenies of 71 emetic Group III *B. cereus*  
873 *s.l.* genomes and their closely related, non- emetic counterparts, plus outgroup genomes (A and  
874 B) *B. anthracis* str. Ames, and (C) *B. cereus s.l.* str. AFS057383. Phylogenies were constructed  
875 using (A) core, and (B and C) majority SNPs. Tree edge and node colors correspond to the  
876 posterior probability (PP) of being in a *ces*-negative state, obtained using an empirical Bayes  
877 approach, in which a continuous-time reversible Markov model was fitted, followed by 1,000  
878 simulations of stochastic character histories using the fitted model and tree tip states. Equal root  
879 node prior probabilities for *ces*- positive and *ces*-negative states were used. Each phylogeny was  
880 rooted along its respective outgroup genome, and branch lengths are reported in  
881 substitutions/site.

882 **Supplemental Figure S2.** Maximum likelihood phylogenies of 71 emetic Group III *B. cereus*  
883 *s.l.* genomes and their closely related, non-emetic counterparts, plus outgroup genomes (A) *B.*  
884 *anthracis* str. Ames, and (B) *B. cereus s.l.* str. AFS057383. Phylogenies were constructed using  
885 (1) core, and (2) majority SNPs. Tree edge and node colors correspond to the posterior  
886 probability (PP) of being in a *ces*-negative state, obtained using an empirical Bayes approach, in  
887 which a continuous-time reversible Markov model was fitted, followed by 1,000 simulations of  
888 stochastic character histories using the fitted model and tree tip states. Root node prior  
889 probabilities for *ces*-positive and *ces*-negative states were estimated using the `make.simmap`  
890 function in the `phytools` package in R. Each phylogeny is rooted along its respective outgroup,  
891 and branch lengths are reported in substitutions/site.

892 **Supplemental Figure S3.** Rooted, time-scaled maximum clade credibility (MCC) phylogenies  
893 constructed using core SNPs identified among 23 Group III *B. cereus s.l.* genomes belonging to

894 sequence type (ST) 26. Ancestral state reconstruction was performed using the following priors  
895 on the root node: (A) probability of the root node belonging to a *ces*-positive or *ces*-negative  
896 state set to 0.5 each; or (B) probability of the root node being in a *ces*-positive or *ces*-negative  
897 state set to 0.2 and 0.8, respectively. Branch color corresponds to probability of a lineage being  
898 in a *ces*-negative state. Pie charts at nodes denote the posterior probability (PP) of a node being  
899 in a *ces*-negative (teal) or *ces*-positive (pink) state. Branch length is reported in  
900 substitutions/site/year. Core SNPs were identified using Snippy version 4.3.6. The phylogenies  
901 were constructed using the results of five independent runs using a relaxed lognormal clock  
902 model, the Standard\_TVMef nucleotide substitution model, and the Birth Death Skyline Serial  
903 population model implemented in BEAST version 2.5.1, with 10% burn-in applied to each run.  
904 LogCombiner-2 was used to combine BEAST2 log files, and TreeAnnotator-2 was used to  
905 construct the phylogeny using common ancestor node heights.

906 **Supplemental Table S1.** Genomic data and metadata used in this study ( $n = 150$ ).

907 **Supplemental Table S2.** Results of cereulide synthetase ancestral state reconstruction.

908 **Supplemental Text.** Detailed descriptions of all methods, plus references.

909

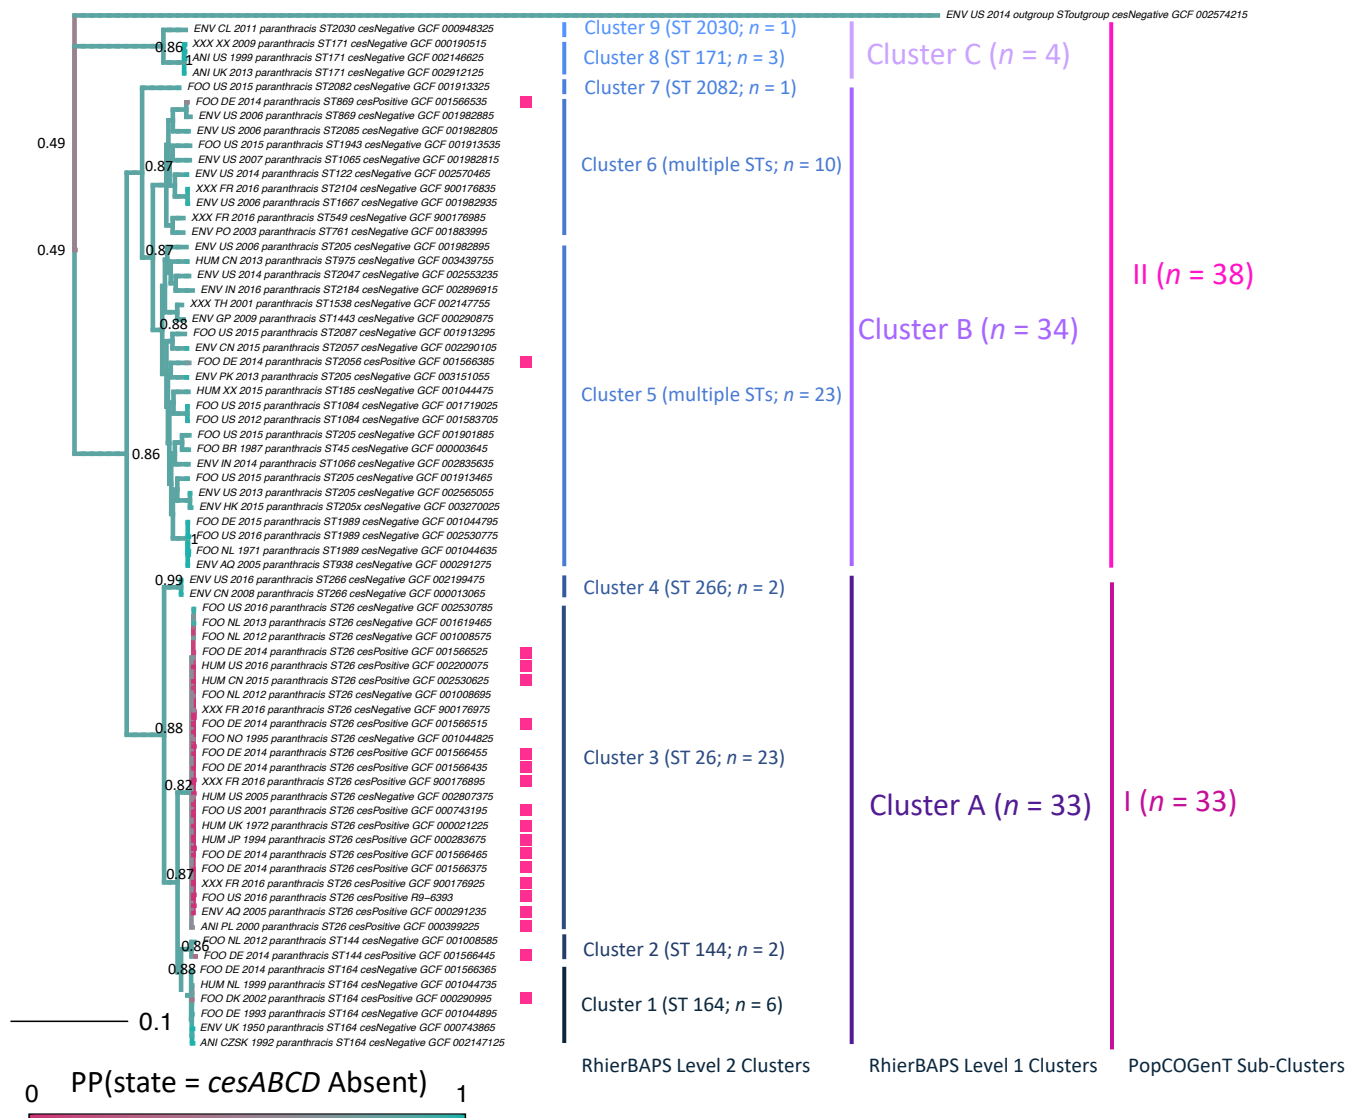

**Figure 1.** Maximum likelihood phylogeny constructed using core SNPs identified among 71 emetic Group III *B. cereus s.l.* genomes and their closely related, non-emetic counterparts, plus outgroup genome *B. cereus s.l.* str. AFS057383. Tip labels of genomes possessing cereulide synthetase encoding genes *cesABCD* are annotated with a pink square. Clade labels correspond to (i) RhierBAPs level 2 cluster assignments, denoted as Cluster 1 to 9, with number of isolates assigned to a cluster ( $n$ ) and sequence type (ST) determined using *in silico* multi-locus sequence typing (MLST) listed in parentheses; (ii) RhierBAPs level 1 cluster assignments, denoted as Cluster A, B, and C; (iii) PopCOGenT sub-cluster assignments, denoted as I and II. Tree edge and node colors correspond to the posterior probability (PP) of being in a *ces*-negative state, obtained using an empirical Bayes approach, in which a continuous-time reversible Markov model was fitted, followed by 1,000 simulations of stochastic character histories using the fitted model and tree tip states. Equal root node prior probabilities for *ces*-positive and *ces*-negative states were used. Node labels denote selected PP values, chosen for readability.

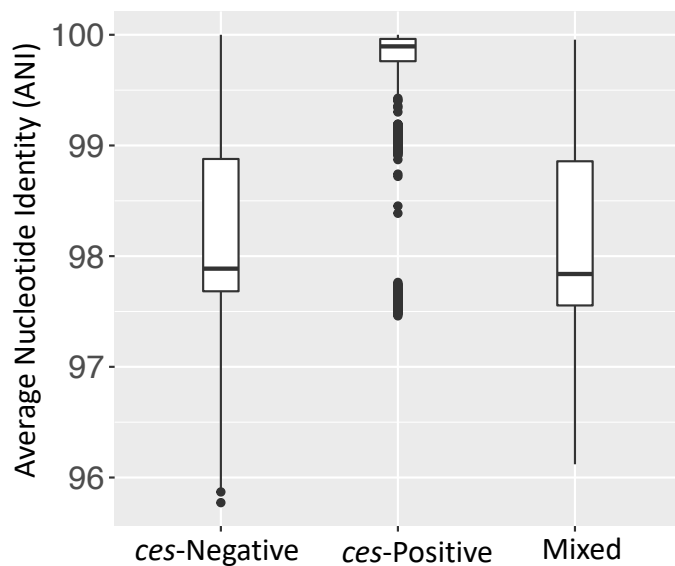

**Figure 2.** Pairwise average nucleotide identity (ANI) values calculated between Group III *B. cereus s.l.* genomes in which (i) both the query and reference genome lacked *cesABCD* (*ces*-negative;  $n = 90$ ); (ii) both the query and reference genome possessed *cesABCD* (*ces*-positive;  $n = 60$ ); (iii) the query genome possessed *cesABCD* and the reference genome lacked *cesABCD* and vice versa (mixed). Pairwise ANI values were calculated using FastANI version 1.0. Lower and upper box hinges correspond to the first and third quartiles, respectively. Lower and upper whiskers extend from the hinge to the smallest and largest values no more distant than 1.5 times the interquartile range from the hinge, respectively. Points represent pairwise distances that fall beyond the ends of the whiskers.

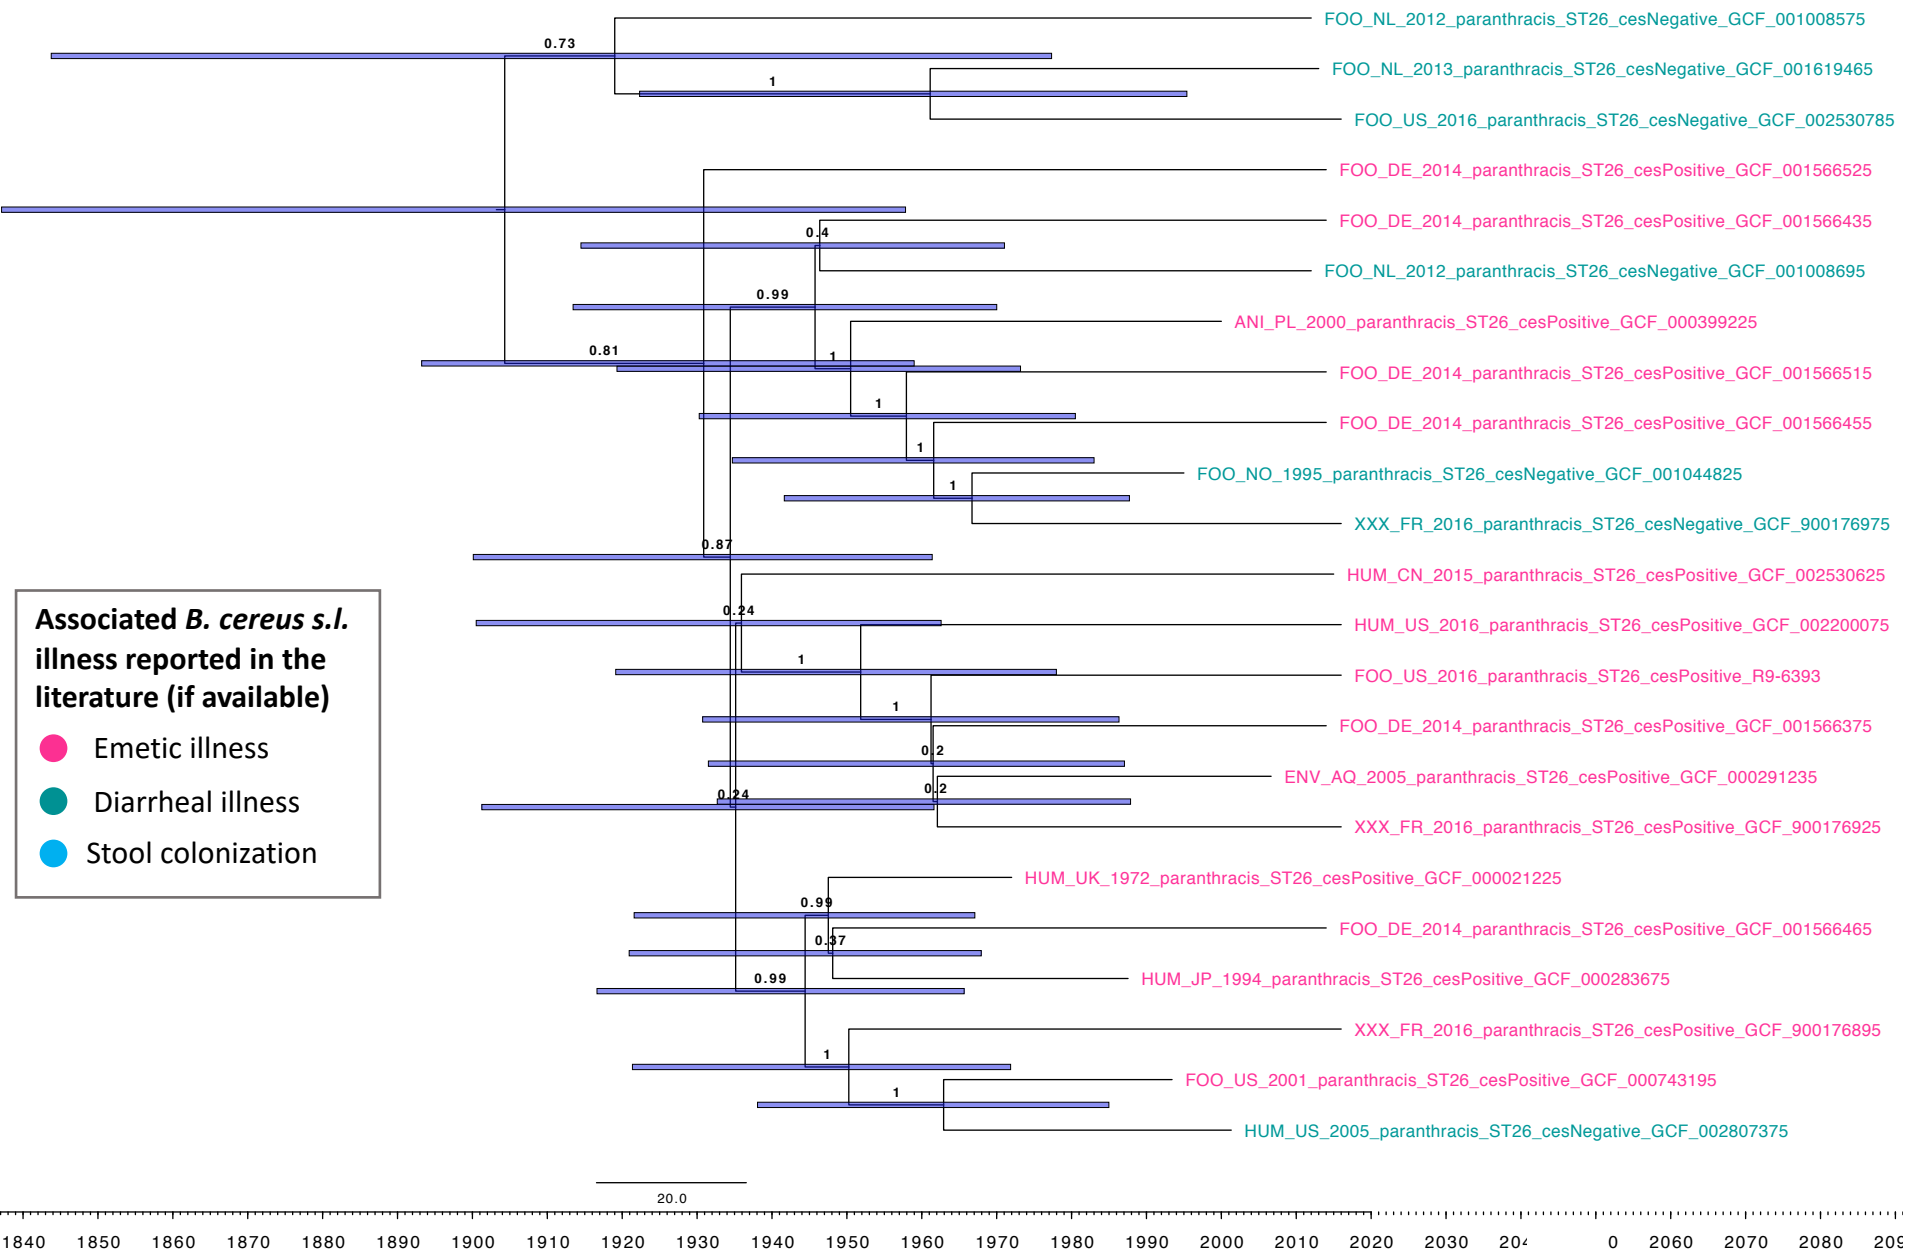

**Figure 3.** Rooted, time-scaled maximum clade credibility (MCC) phylogeny constructed using core SNPs identified among 23 Group III *B. cereus s.l.* genomes belonging to sequence type (ST) 26. Tip label colors denote *ces*-positive (pink) and *ces*-negative (teal) genomes predicted to be capable and incapable of producing cereulide, respectively. Tip labels of isolates that could be associated with a known *B. cereus s.l.* illness in the literature (emetic, diarrheal, or stool colonization) are annotated on the right side with a pink, teal, or blue circle, respectively (note that additional isolates were associated with illness; however, these are not annotated, as the type of illness could not be confirmed from the available literature). Branch labels denote posterior probabilities of branch support. Time in years is plotted along the X-axis, with branch length reported in substitutions/site/year. Node bars denote 95% highest posterior density (HPD) intervals for common ancestor node heights. Core SNPs were identified using Snippy version 4.3.6. The phylogeny was constructed using the results of five independent runs using a relaxed lognormal clock model, the Standard\_TVMef nucleotide substitution model, and the Birth Death Skyline Serial population model implemented in BEAST version 2.5.1, with 10% burn-in applied to each run. LogCombiner-2 was used to combine BEAST 2 log files, and TreeAnnotator-2 was used to construct the phylogeny using common ancestor node heights.

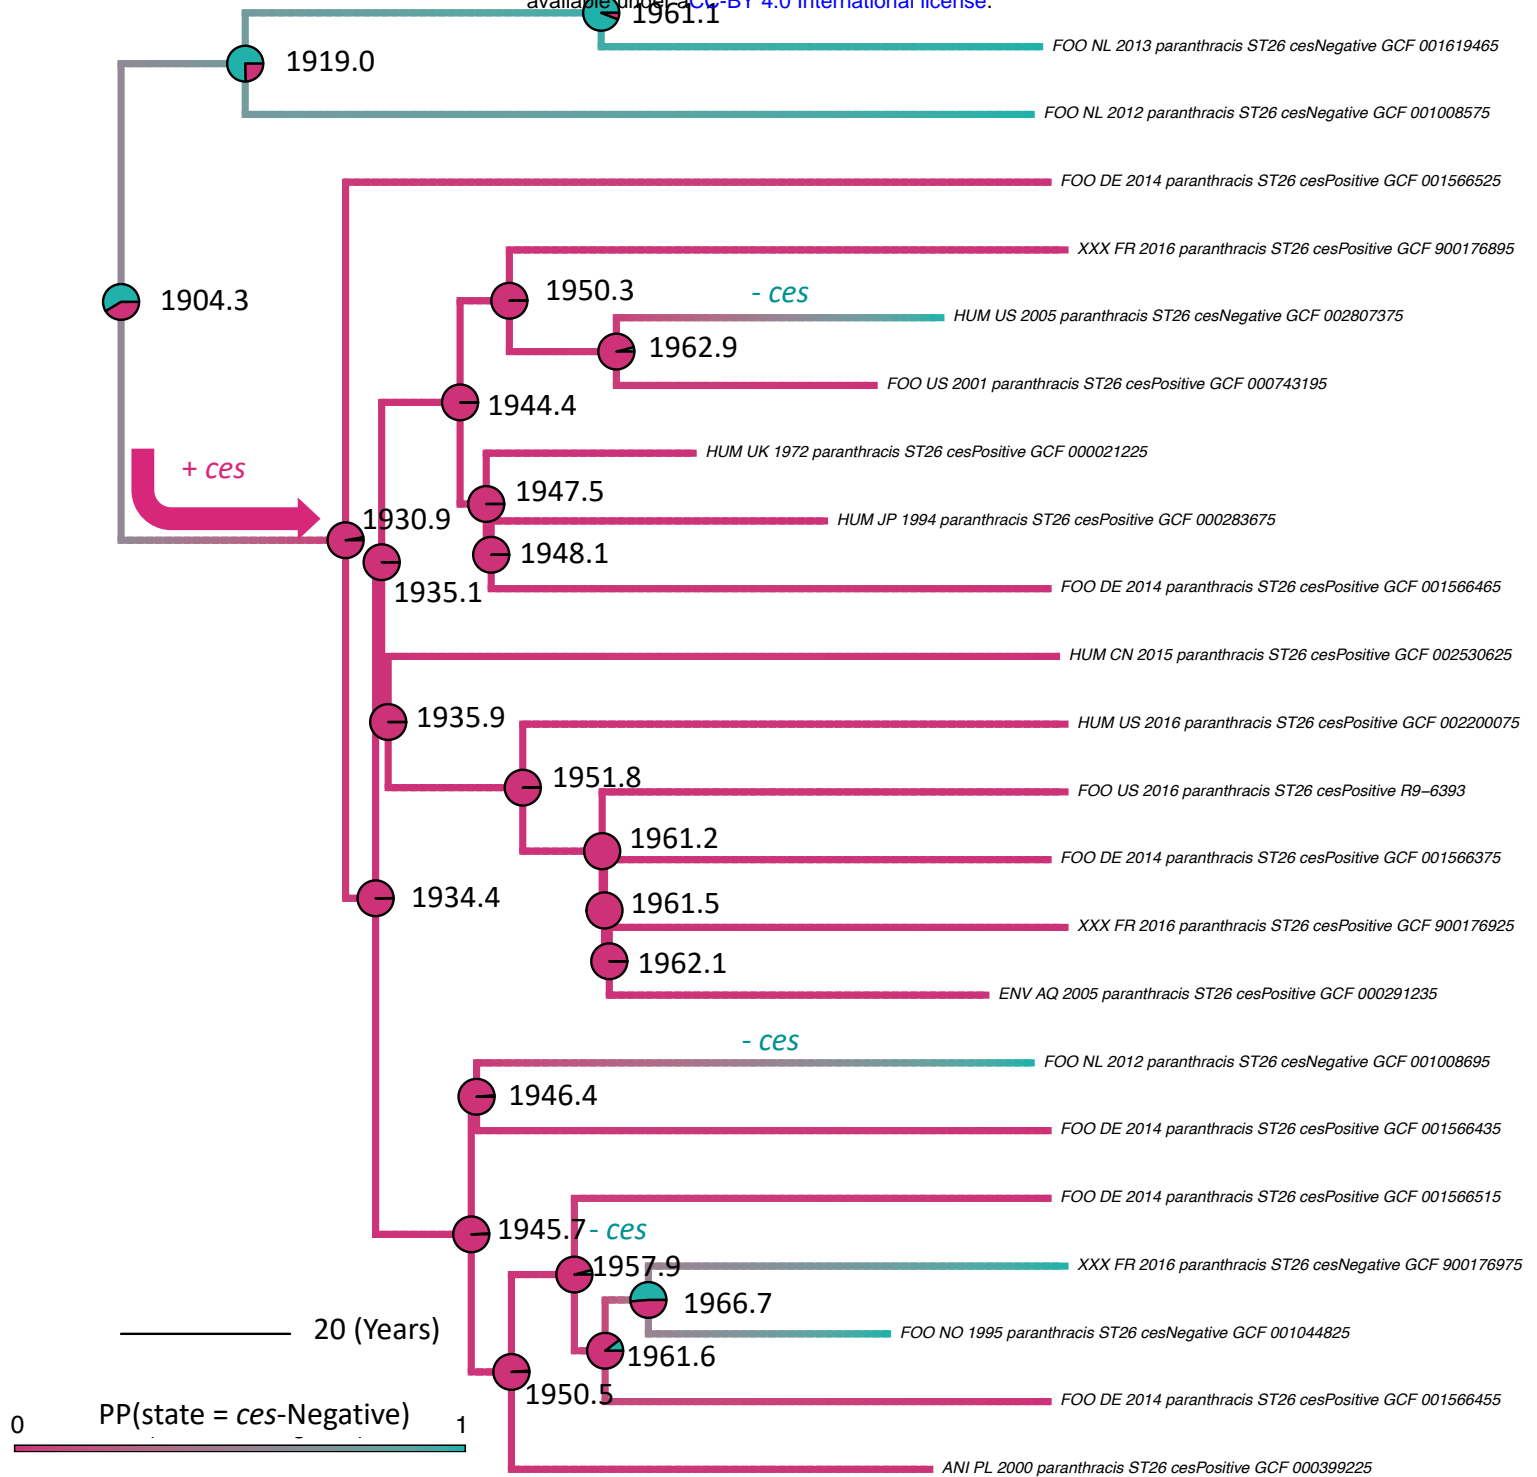

**Figure 4.** Rooted, time-scaled maximum clade credibility (MCC) phylogeny constructed using core SNPs identified among 23 Group III *B. cereus* s.l. genomes belonging to sequence type (ST) 26. Branch color corresponds to posterior density, denoting the probability of a lineage being in a *ces*-negative state as determined using ancestral state reconstruction. Pie charts at nodes denote the posterior probability (PP) of a node being in a *ces*-negative (teal) or *ces*-positive (pink) state. Arrows along branches denote a *ces* gain event. Labels along branches denote a *ces* gain or loss event (denoted by + *ces* or - *ces*, respectively). Node labels correspond to node ages in years, while branch lengths are reported in substitutions/site/year. Core SNPs were identified using Snippy version 4.3.6. The phylogeny was constructed using the results of five independent runs using a relaxed lognormal clock model, the Standard TVMef nucleotide substitution model, and the Birth Death Skyline Serial population model implemented in BEAST version 2.5.1, with 10% burn-in applied to each run. LogCombiner-2 was used to combine BEAST 2 log files, and TreeAnnotator-2 was used to construct the phylogeny using common ancestor node heights. Ancestral state reconstruction was performed using a prior on the root node in which the probability of the ST 26 ancestor being *ces*-positive or *ces*-negative was estimated using the make.simmap function in the phytools package in R. For ancestral state reconstruction results obtained using different root node priors, see Supplemental Figure S3.
